# Supplementary material
Source: PubMed Central journal article supplement (PMC2720632)

## Supporting Information

# Highly Diastereoselective Preparation of *anti*-1,2-Diols by Catalytic Addition of Alkynylsilanes to $\alpha$ -Silyloxyaldehydes

Kanicha Sa-ei and John Montgomery\*

*Department of Chemistry, University of Michigan, Ann Arbor, MI 48109*

jmontg@umich.edu

Unless otherwise noted, all reactions were conducted in flame-dried glassware under a nitrogen atmosphere. Tetrahydrofuran was purified with an Innovative Technologies SPS-400 solvent system under nitrogen. Ni(COD)<sub>2</sub> (Strem Chemicals Inc., used as received), 1,3-dimesitylimidazolium chloride<sup>1</sup> (**1**) and *tert*-butoxide (Acros, Fisher Scientific International Inc., used as received) were stored and weighed in an argon or nitrogen inert atmosphere glovebox. All alkynes (Sigma-Aldrich) were distilled and stored under nitrogen gas. All aldehydes were freshly prepared or re-purified with column chromatography (SiO<sub>2</sub>) and flushed with nitrogen gas before using. <sup>1</sup>H and <sup>13</sup>C spectra were obtained in CDCl<sub>3</sub> at rt, on a Varian Mercury 400 or Varian Unity 500 MHz instrument. Chemical shifts of <sup>1</sup>H NMR spectra were recorded in parts per million (ppm) on the  $\delta$  scale from an internal standard of residual chloroform (7.21 ppm). Chemical shifts of <sup>13</sup>C NMR spectra were recorded in ppm from the central peak of CDCl<sub>3</sub> (77.0 ppm) on the  $\delta$  scale. High resolution mass spectra (HRMS) were obtained on a VG-70-250-s spectrometer manufactured by Micromass Corp. (Manchester UK) at the

University of Michigan Mass Spectrometry Laboratory. Where the diastereomers are separable, data for the pure major diastereomer is provided; where the diastereomers are not separable,  $^1\text{H}$  NMR assignments for the minor isomer are tentative in overlapping regions. A complete list of all resolved peaks in the  $^{13}\text{C}$  NMR is provided.

### General Procedure for Ni-catalyzed Diastereoselective Coupling Reaction:

Tetrahydrofuran (4.0 mL) was added to a solid mixture of imidazolium chloride salt **1** (17.0 mg, 0.050 mmol), potassium *t*-butoxide (6 mg, 0.05 mmol) and  $\text{Ni}(\text{COD})_2$  (14 mg, 0.05 mmol) at rt. The resulting solution was stirred for 5 min until the color turned dark blue. The silane (200 mol %) was added, followed by addition of a tetrahydrofuran solution (1.0 mL) of the aldehyde (0.50 mmol) and alkyne (0.60 mmol). The reaction mixture was stirred 1 h at rt or until the aldehyde was consumed. The reaction mixture was quenched with 50% sodium bicarbonate solution and was extracted with diethyl ether three times. The combined organic layer was washed with brine, dried over magnesium sulfate, filtered and concentrated *in vacuo*. The residue was purified via flash chromatography ( $\text{SiO}_2$ ) to afford the desired product. The diastereoselectivities were determined by crude NMR and/or GC-MS.

### Table 1 Optimization of Diastereoselectivity

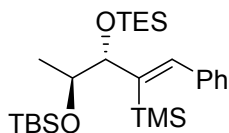

**(3S,4S,Z)-4-(*tert*-Butyldimethylsiloxy)-1-phenyl-3-(triisopropylsiloxy)-2-(trimethylsilyl)pent-1-ene (Entry 1)**

Following the general procedure, (*S*)-2-(*tert*-butyldimethylsilyloxy)propanal<sup>2</sup> (94 mg, 0.50 mmol), 1-phenyl-2-(trimethylsilyl)acetylene (104 mg, 0.60 mmol), Ni(COD)<sub>2</sub> (14 mg, 0.05 mmol), imidazolium salt **1** (17 mg, 0.05 mmol), *t*-BuOK (6 mg, 0.05 mmol) and triethylsilane (116 mg, 1.0 mmol) gave, after column chromatography (hexanes), 86 mg of (*3S,4S,Z*)-4-(*tert*-butyldimethylsilyloxy)-1-phenyl-3-(triisopropylsilyloxy)-2-(trimethylsilyl)pent-1-ene (36%, dr 89:11) as a colorless oil. <sup>1</sup>H NMR (400 MHz, CDCl<sub>3</sub>) δ major diastereomer 7.52 (s, 1H), 7.12-7.27 (m, 5H), 4.40 (dd, *J* = 1.6, 2.8 Hz, 1H), 3.81 (dq, *J* = 2.8, 6.4 Hz, 1H), 1.04 (d, *J* = 6.4 Hz, 3H), 0.96 (t, *J* = 8.0 Hz, 9H), 0.88 (s, 9H), 0.62 (q, *J* = 8.0 Hz, 6H), 0.052 (s, 6H), -0.08 (s, 9H); <sup>13</sup>C NMR (100 MHz, CDCl<sub>3</sub>) δ major diastereomer 143.6, 142.2, 140.8, 128.3, 127.7, 126.7, 80.0, 71.5, 26.0, 18.1, 16.0, 7.0, 5.1, 0.85, 4.3, 4.1; IR (film) 3058, 2954, 1593 cm<sup>-1</sup>; HRMS ES<sup>+</sup> (*m/z*): [M+Na]<sup>+</sup> calc for C<sub>26</sub>H<sub>50</sub>O<sub>2</sub>Si<sub>3</sub>, 501.3016; found 501.3026.

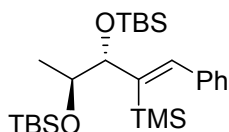

**(*3S,4S,Z*)-3,4-(Bis-*tert*-butyldimethylsilyloxy)-1-phenyl-2-(trimethylsilyl)pent-1-ene**

**(Entry 2)**

Following the general procedure, (*S*)-2-(*tert*-butyldimethylsilyloxy)propanal<sup>2</sup> (94 mg, 0.50 mmol), 1-phenyl-2-(trimethylsilyl)acetylene (104 mg, 0.60 mmol), Ni(COD)<sub>2</sub> (14 mg, 0.05 mmol), imidazolium salt **1** (17 mg, 0.05 mmol), *t*-BuOK (6 mg, 0.05 mmol) and *t*-butyldimethylsilane (116 mg, 1.0 mmol) gave, after column chromatography (hexanes), 116 mg of (*3S,4S,Z*)-3,4-(bis-*tert*-butyldimethylsilyloxy)-1-phenyl-2-(trimethylsilyl)pent-1-ene (48%, dr 88:12) as a colorless oil. <sup>1</sup>H NMR (400 MHz, CDCl<sub>3</sub>) δ major diastereomer

7.51 (s, 1H), 7.16-7.26 (m, 3H), 7.10-7.12 (m, 2H), 4.39 (dd,  $J = 2.0, 2.8$  Hz, 1H), 3.79 (dq,  $J = 2.8, 6.4$  Hz, 1H), 1.03 (d,  $J = 6.4$  Hz, 3H), 0.91 (s, 9H), 0.87 (s, 9H), 0.07 (s, 3H), 0.04 (s, 9H), -0.09 (s, 9H);  $^{13}\text{C}$  NMR (100 MHz,  $\text{CDCl}_3$ )  $\delta$  major isomer 143.4, 142.5, 140.8, 128.3, 127.7, 126.7, 79.9, 71.4, 26.0, 25.98, 18.4, 18.1, 15.7, 0.8, -4.18, -4.24, -4.4, -4.6; IR (film) 3058, 3023, 2955, 2857, 1593  $\text{cm}^{-1}$ ; HRMS  $\text{ES}^+$  ( $m/z$ ):  $[\text{M}+\text{Na}]^+$  calc for  $\text{C}_{26}\text{H}_{50}\text{O}_2\text{Si}_3$  501.3016; found 501.3021.

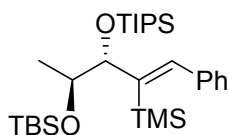

**(3*S*,4*S*,*Z*)-4-(*tert*-Butyldimethylsilyloxy)-1-phenyl-3-(triisopropylsilyloxy)-2-(trimethylsilyl)pent-1-ene (Entry 3)**

Following the general procedure, (*S*)-2-(*tert*-butyldimethylsilyloxy)propanal<sup>2</sup> (94 mg, 0.50 mmol), 1-phenyl-2-(trimethylsilyl)acetylene (104 mg, 0.60 mmol),  $\text{Ni}(\text{COD})_2$  (14 mg, 0.05 mmol), imidazolium salt **1** (17.0 mg, 0.05 mmol), *t*-BuOK (6 mg, 0.05 mmol) and triisopropylsilane (158 mg, 1.0 mmol) gave, after column chromatography (hexanes), 196 mg of (3*S*,4*S*,*Z*)-4-(*tert*-butyldimethylsilyloxy)-1-phenyl-3-(triisopropylsilyloxy)-2-(trimethylsilyl)pent-1-ene (75%, dr 89:11) as a colorless oil.  $^1\text{H}$  NMR (400 MHz,  $\text{CDCl}_3$ )  $\delta$  major diastereomer: 7.61 (s, 1H), 7.18-7.27 (m, 3H), 7.12-7.14 (m, 2H), 4.70-4.71 (m, 1H), 3.81 (dq,  $J = 1.6, 6.0$  Hz, 1H), 1.03-1.19 (m, 24H), 0.88 (s, 9H), 0.05 (s, 6H), -0.08 (s, 9H), minor diastereomer: 7.63 (s, 1H), 7.18-7.27 (m, 3H), 7.12-7.14 (m, 2H), 4.69 (dd,  $J = 1.2, 4.0$  Hz, 1H), 3.96-3.48 (m, 1H), 1.03-1.19 (m, 24H), 0.89 (s, 9H), 0.08 (s, 6H), -0.08 (s, 9H);  $^{13}\text{C}$  NMR (100 MHz,  $\text{CDCl}_3$ )  $\delta$  2 diastereomers 143.6, 142.0, 140.8, 128.5, 128.3, 127.8, 127.7, 126.7, 79.4, 71.9, 26.2, 26.0, 18.4, 18.3, 18.2, 18.1,

14.6, 12.9, 12.4, 1.2, 0.60, -4.2, -4.3, IR (film) 3057, 3023, 2944, 2805, 1593  $\text{cm}^{-1}$ ;  
 HRMS  $\text{ES}^+$  ( $m/z$ ):  $[\text{M}+\text{Na}]^+$  calc for  $\text{C}_{29}\text{H}_{56}\text{O}_2\text{Si}_3$ , 543.3486; found 543.3492.

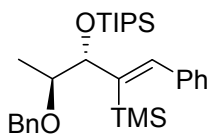

**(3*S*,4*S*,*Z*)-4-Benzyloxy-1-phenyl-3-(triisopropylsiloxy)-2-(trimethylsilyl)pent-1-ene**

**(Entry 4)**

Following the general procedure, (*S*)-2-(benzyloxy)propanal<sup>3</sup> (164 mg, 1.0 mmol), 1-phenyl-2-(trimethylsilyl)acetylene (209 mg, 1.2 mmol),  $\text{Ni}(\text{COD})_2$  (28 mg, 0.05 mmol), imidazolium salt **1** (34.0 mg, 0.1 mmol), *t*-BuOK (11 mg, 0.1 mmol) and triisopropylsilane (316 mg, 2.0 mmol) gave, after column chromatography (3% diethyl ether in hexanes), 401 mg of (3*S*,4*S*,*Z*)-4-benzyloxy-1-phenyl-3-(triisopropylsiloxy)-2-(trimethylsilyl)pent-1-ene (81%, dr 78:22) as a colorless oil.  $^1\text{H}$  NMR (400 MHz,  $\text{CDCl}_3$ )  $\delta$  major diastereomer: 7.62 (s, 1H), 7.12-7.35 (m, 5H), 4.80 (m, 1H), 4.59 (d,  $J = 12.0$  Hz, 1H), 4.49 (d,  $J = 12.0$  Hz, 1H), 3.45 (dq,  $J = 2.0, 6.0$  Hz, 1H), 1.03-1.14 (m, 24H), -0.16 (s, 9H), minor diastereomer: 7.59 (s, 1H), 7.12-7.35 (m, 5H), 4.76 (d,  $J = 4.4$  Hz, 1H), 4.59 (d,  $J = 12.0$  Hz, 1H), 4.49 (d,  $J = 12.0$  Hz, 1H), 3.68 (dq,  $J = 1.6, 6.0$  Hz, 1H), 1.03-1.14 (m, 24H), -0.12 (s, 9H);  $^{13}\text{C}$  NMR (100 MHz,  $\text{CDCl}_3$ )  $\delta$  143.7, 143.4, 142.9, 142.0, 140.9, 140.7, 139.0, 138.7, 128.5, 128.3, 128.2, 128.1, 127.8, 127.4, 127.2, 126.8, 78.6, 77.6, 70.9, 70.4, 18.3, 18.2, 18.1, 12.7, 12.4, 11.3, 1.2, 0.5; IR (film) 3061, 3026, 2942, 2864, 1592  $\text{cm}^{-1}$ ; HRMS  $\text{ES}^+$  ( $m/z$ ):  $[\text{M}+\text{Na}]^+$  calc for  $\text{C}_{30}\text{H}_{48}\text{O}_2\text{Si}_2$ , 519.3091; found 519.3090.

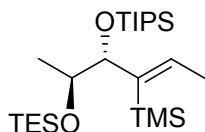

**(4*S*,5*S*,*Z*)-5-(Triethylsilyloxy)-4-(triisopropylsilyloxy)-3-(trimethylsilyl)hex-2-ene (Entry 5)**

Following the general procedure, (*S*)-2-(triethylsilyloxy)propanal<sup>4</sup> (94 mg, 0.50 mmol), 1-(trimethylsilyl)-1-propyne (67 mg, 0.60 mmol), Ni(COD)<sub>2</sub> (14 mg, 0.05 mmol), imidazolium salt **1** (17 mg, 0.05 mmol), *t*-BuOK (6 mg, 0.05 mmol) and triisopropylsilane (158 mg, 1.0 mmol) gave, after column chromatography (hexanes), 172 mg of (4*S*,5*S*,*Z*)-5-(triethylsilyloxy)-4-(triisopropylsilyloxy)-3-(trimethylsilyl)hex-2-ene (75%, dr 81:19) as a colorless oil. <sup>1</sup>H NMR (400 MHz, CDCl<sub>3</sub>) δ major diastereomer: 6.43 (dq, *J* = 1.2, 7.2 Hz, 1H), 4.39 (m, 1H), 3.59 (dq, *J* = 2.2, 6.4 Hz, 1H), 1.75 (dd, *J* = 1.2, 7.2 Hz, 3H), 0.96-1.04 (m, 24H), 0.91 (t, *J* = 8.0 Hz, 9H), 0.54 (q, *J* = 8 Hz, 6H), 0.11 (s, 9H); minor diastereomer: 6.38 (q, *J* = 7.2 Hz, 1H), 4.46 (m, 1H), 3.84 (dq, *J* = 4.6, 6.0 Hz, 1H), 1.79 (d, *J* = 7.2 Hz, 3H), 0.96-1.04 (m, 24H), 0.91 (t, *J* = 8.0 Hz, 9H), 0.56 (q, *J* = 8.0 Hz, 6H), 0.12 (s, 9H); <sup>13</sup>C NMR (100 MHz, CDCl<sub>3</sub>) δ 2 diastereomers: 139.9, 139.0, 137.4, 79.1, 72.6, 72.0, 18.2, 18.1, 17.6, 17.5, 12.8, 12.6, 6.9, 5.1, 4.9, 0.6, 0.04; IR (film) 2953, 2867, 1617 cm<sup>-1</sup>; HRMS ES<sup>+</sup> (*m/z*): [M+Na]<sup>+</sup> calc for C<sub>24</sub>H<sub>54</sub>O<sub>2</sub>Si<sub>3</sub>, 481.3329; found 481.3330.

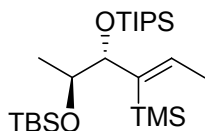

**(4*S*,5*S*,*Z*)-5-(*tert*-Butyldimethylsilyloxy)-4-(triisopropylsilyloxy)-2-(trimethylsilyl)hex-2-ene (Entry 6)**

Following the general procedure, (*S*)-2-(*tert*-butyldimethylsilyloxy)propanal<sup>2</sup> (94 mg, 0.50 mmol), 1-(trimethylsilyl)-1-propyne (67 mg, 0.60 mmol), Ni(COD)<sub>2</sub> (14 mg, 0.05 mmol), imidazolium salt **1** (17 mg, 0.05 mmol), *t*-BuOK (6 mg, 0.05 mmol) and triisopropylsilane (158 mg, 1.0 mmol) gave, after column chromatography (hexanes), 185 mg of (4*S*,5*S*,*Z*)-5-(*tert*-butyldimethylsilyloxy)-4-(triisopropylsilyloxy)-2-(trimethylsilyl)hex-2-ene (81%, dr 89:11) as a colorless oil. <sup>1</sup>H NMR (400 MHz, CDCl<sub>3</sub>) δ major diastereomer: 6.40 (dq, *J* = 0.8, 6.8 Hz, 1H), 4.34(m, 1H), 3.53 (dq, *J* = 2.0, 6.4 Hz, 1H), 1.69 (dd, *J* = 1.2, 7.2 Hz, 3H), 0.93-0.98 (m, 21H), 0.91 (d, *J* = 6.4 Hz, 3H), 0.78 (s, 9H), 0.05 (s, 9H), -0.057 (s, 3H), -0.06(s, 3H), minor diastereomer: 6.30-6.36 (m, 1H), 4.29 (d, *J* = 4.0 Hz, 1H), 3.76 (dq, *J* = 4.4, 6.0 Hz, 1H), 1.73 (dd, *J* = 0.8, 7.2 Hz, 3H), 0.93-0.98 (m, 21H), 0.86 (d, *J* = 6.0 Hz, 3H), 0.78 (s, 9H), 0.06 (s, 9H), -0.057 (s, 3H), -0.06 (s, 3H); <sup>13</sup>C NMR (100 MHz, CDCl<sub>3</sub>) δ 2 diastereomers: 140.0, 137.5, 79.2, 72.4, 26.2, 26.0, 18.28, 18.23, 18.15, 18.08, 17.5, 12.7, 12.4, 0.6, 0.1, -4.1, -4.4; IR (film) 2944, 1617 cm<sup>-1</sup>; HRMS ES<sup>+</sup> (*m/z*): [M+Na]<sup>+</sup> calc for C<sub>24</sub>H<sub>54</sub>O<sub>2</sub>Si<sub>3</sub>, 481.3329; found 481.3333.

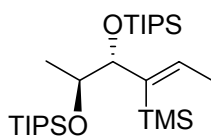

**(4*S*,5*S*,*Z*)-4,5-(Bistriisopropylsilyloxy)-2-(trimethylsilyl)hex-2-ene (Entry 7)**

Following the general procedure, (*S*)-2-(triisopropylsilyloxy)propanal<sup>2</sup> (116 mg, 0.50 mmol), 1-(trimethylsilyl)-1-propyne (67 mg, 0.60 mmol), Ni(COD)<sub>2</sub> (14 mg, 0.05 mmol), imidazolium salt **1** (17 mg, 0.05 mmol), *t*-BuOK (6 mg, 0.05 mmol) and triisopropylsilane (158 mg, 1.0 mmol) gave, after column chromatography (hexanes), 182 mg of (4*S*,5*S*,*Z*)-4,5-(bistriisopropylsilyloxy)-2-(trimethylsilyl)hex-2-ene (73%, dr 88:12)

as a colorless oil.  $^1\text{H}$  NMR (400 MHz,  $\text{CDCl}_3$ )  $\delta$  major diastereomer: 6.42 (dq,  $J = 1.2$ , 7.2 Hz, 1H), 4.45 (m, 1H), 3.78 (dq,  $J = 2.0$ , 6.4 Hz, 1H), 1.74 (dd,  $J = 0.8$ , 7.2 Hz, 3H), 0.89-1.01 (m, 45H), 0.10 (s, 9H), minor isomer: 6.39 (dq,  $J = 0.8$ , 7.2 Hz, 1H), 4.38 (d,  $J = 3.6$  Hz, 1H), 3.89-3.95 (m, 1H), 1.78, (dd,  $J = 0.8$ , 7.2 Hz, 3H), 0.89-1.01 (m, 45H), 0.12 (s, 9H);  $^{13}\text{C}$  NMR (100 MHz,  $\text{CDCl}_3$ )  $\delta$  2 diastereomers: 140.2, 139.2, 137.5, 128.0, 127.9, 127.6, 127.2, 127.1, 78.9, 78.8, 71.2, 70.5, 18.18, 18.14, 18.13, 18.10, 17.6, 17.5, 12.6, 12.4, 0.69, 0.04; IR (flim) 2943, 2865, 1617  $\text{cm}^{-1}$ ; HRMS  $\text{ES}^+$  ( $m/z$ ):  $[\text{M}+\text{Na}]^+$  calc for  $\text{C}_{27}\text{H}_{60}\text{O}_2\text{Si}_3$ , 523.3799; found 523.3809.

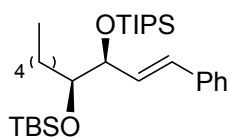

**(3*S*\*,4*S*\*,*E*)-4-(*tert*-Butyldimethylsilyloxy)-1-phenyl-3-(triisopropylsilyloxy)non-1-ene**

**(Entry 8)**

Tetrahydrofuran (3.0 mL) was added to a solid mixture of imidazolium chloride salt **1** (17 mg, 0.05 mmol), *t*-BuOK (6 mg, 0.05 mmol) and  $\text{Ni}(\text{COD})_2$  (14 mg, 0.05 mmol) at rt. The resulting solution was stirred for 5 min until the color turned to dark blue. Triisopropylsilane (158 mg, 1.0 mmol) was added, followed by addition of a tetrahydrofuran solution (1.0 mL) of 2-(*tert*-butyldimethylsilyloxy)heptanal<sup>5</sup> (122 mg, 0.50 mmol). The solution of phenyl acetylene (61 mg, 0.60 mmol) in tetrahydrofuran (1.0 mL) was added by syringe drive over 2 h. The reaction mixture was stirred for 0.5 h after the addition was completed. The reaction mixture was quenched with 50% sodium bicarbonate solution and extracted with diethyl ether three times. The combined organic layer was washed with brine, dried over magnesium sulfate, filtered and concentrated *in*



*vacuo*. The residue was purified via flash chromatography (SiO<sub>2</sub>) (2 % diethylether in hexanes) to afford 90 mg of (3*S*\*,4*S*\*,*E*)-4-(*tert*-butyldimethylsiloxy)-1-phenyl-3-(triisopropylsiloxy)non-1-ene, (19%, dr 59:41) as a colorless oil. <sup>1</sup>H NMR (400 MHz, CDCl<sub>3</sub>) δ major diastereomer: 7.26-7.35 (m, 3H), 7.16-7.23 (m, 2H), 6.56 (d, *J* = 16.0 Hz, 1H), 6.29 (dd, *J* = 16.0, 5.0 Hz, 1H), 4.41 (dt, *J* = 1.2, 4.8 Hz, 1H), 3.65-3.72 (m, 1H), 1.62-1.67 (m, 1H), 1.34-1.49 (m, 2H), 1.14-1.30 (m, 5H), 0.96-1.10 (m, 21H), 0.88 (s, 9H), 0.81-0.87 (m, 3H), 0.07 (s, 3H), 0.04 (s, 3H); minor diastereomer: 7.26-7.35 (m, 3H), 7.16-7.23 (m, 2H), 6.40 (d, *J* = 16.0 Hz, 1H), 6.15 (dd, *J* = 16.0, 8.0 Hz, 1H), 4.18 (dd, *J* = 4.0, 8.0 Hz, 1H), 3.65-3.72 (m, 1H), 1.34-1.49 (m, 2H), 1.14-1.30 (m, 6H), 0.96-1.10 (m, 21H), 0.83 (s, 9H), 0.81-0.87 (m, 3H), 0.01 (s, 2H), 0.00 (s, 3H); <sup>13</sup>C NMR (100 MHz, CDCl<sub>3</sub>) δ 2 diastereomers: 137.5, 137.2, 131.05, 131.01, 130.00, 129.6, 128.5, 128.4, 127.2, 127.0, 126.4, 126.3, 77.8, 76.9, 75.9, 75.6, 33.9, 32.1, 31.9, 30.6, 29.7, 26.0, 25.9, 25.0, 22.63, 22.61, 18.22, 18.18, 18.15, 18.11, 18.09, 14.1, 14.0, 12.5, 12.4, -4.0, -4.1, -4.5, -4.6; IR (film) 3027, 2955, 2865 cm<sup>-1</sup>; HRMS ES<sup>+</sup> (*m/z*): [M+Na]<sup>+</sup> calc for C<sub>24</sub>H<sub>54</sub>O<sub>2</sub>Si<sub>3</sub>, 527.3717; found 527.3711.

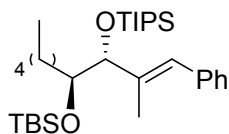

**((3*R*\*,4*S*\*,*E*)-4-(*tert*-Butyldimethylsiloxy)-1-phenyl-3-(triisopropylsiloxy)-2-methylnon-1-ene (Entry 9)**

Following the general procedure, 2-(*tert*-butyldimethylsilyloxy)heptanal<sup>5</sup> (122 mg, 0.50 mmol), phenylpropyne (70 mg, 0.60 mmol), Ni(COD)<sub>2</sub> (14 mg, 0.05 mmol), imidazolium salt **1** (17 mg, 0.05 mmol), *t*-BuOK (6 mg, 0.05 mmol) and triisopropylsilane (158 mg,

1.0 mmol) gave, after column chromatography (2 % diethyl ether in hexanes), 217 mg of ((3*R*\*,4*S*\*,*E*)-4-(*tert*-butyldimethylsiloxy)-1-phenyl-3-(triisopropylsiloxy)-2-methylnon-1-ene (82%, dr 73:27) as a colorless oil. <sup>1</sup>H NMR (400 MHz, CDCl<sub>3</sub>) δ major diastereomer: 7.31-7.14 (m, 5H), 6.38 (s, 1H), 4.14 (d, *J* = 4.0 Hz, 1H), 3.73 (q, *J* = 5.6 Hz, 1H), 1.87 (d, *J* = 1.2 Hz, 3H), 1.17-1.54 (m, 8H), 1.02-1.07 (m, 21H), 0.84 (s, 9H), 0.80-0.87 (m, 3H), 0.02 (s, 3H), 0.01 (s, 3H); minor diastereomer: 7.31-7.14 (m, 5H), 6.56 (s, 1H), 4.27 (d, *J* = 4.0 Hz, 1H), 3.76 (q, *J* = 4.0 Hz, 1H), 1.87 (d, *J* = 1.2 Hz, 3H), 1.17-1.54 (m, 8H), 1.02-1.07 (m, 21H), 0.87 (s, 9H), 0.80-0.87 (m, 3H), 0.08 (s, 3H), 0.05 (s, 3H); <sup>13</sup>C NMR (100 MHz, CDCl<sub>3</sub>) δ 2 diastereomer: 139.2, 138.4, 138.2, 138.0, 129.1, 129.0, 127.99, 127.96, 127.2, 126.1, 126.0, 125.9, 81.7, 79.4, 76.0, 33.5, 32.2, 32.1, 31.5, 26.0, 25.97, 25.2, 22.7, 18.23, 18.19, 18.14, 18.10, 17.3, 15.3, 14.1, 12.7, 12.4, -3.6, -4.1, -4.5, -4.8; IR (film) 3022, 2928, 2864 cm<sup>-1</sup>; HRMS ES<sup>+</sup> (*m/z*): [M+Na]<sup>+</sup> calc for C<sub>31</sub>H<sub>68</sub>O<sub>2</sub>Si<sub>2</sub>, 541.3873, found 541.3884.

**Table 2 Examination of Reaction Scope**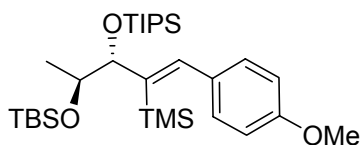

**((3*S*,4*S*,*Z*)-4-(*tert*-Butyldimethylsilyloxy)-1-(4-methoxyphenyl)-3-(triisopropylsilyloxy)-2-(trimethylsilyl)pent-1-ene (Entry 3)**

Following the general procedure, (*S*)-2-(*tert*-butyldimethylsilyloxy)propanal<sup>2</sup> (94 mg, 0.50 mmol), (4-methoxyphenylethynyl) trimethylsilane (122 mg, 0.60 mmol), Ni(COD)<sub>2</sub> (14 mg, 0.05 mmol), imidazolium salt **1** (17 mg, 0.05 mmol), *t*-BuOK (6 mg, 0.05 mmol) and triisopropylsilane (158 mg, 1.0 mmol) gave, after column chromatography (2 % diethyl ether in hexanes), 222 mg of ((3*S*,4*S*,*Z*)-4-(*tert*-butyldimethylsilyloxy)-1-(4-methoxyphenyl)-3-(triisopropylsilyloxy)-2-(trimethylsilyl)pent-1-ene (81%, dr 89:11) as a colorless oil. <sup>1</sup>H NMR (400 MHz, CDCl<sub>3</sub>) δ major diastereomer: 7.55 (s, 1H), 7.07-7.10 (m, 2H), 6.79-6.84 (m, 2H), 4.70-4.71 (m, 1H), 3.78-3.83 (m, 1H), 3.79 (s, 3H), 1.01-1.18 (m, 24H), 0.89 (s, 9H), 0.06 (s, 6H), -0.04 (s, 9H), minor diastereomer: 7.57 (s, 1H), 7.13-7.15 (m, 2H), 6.79-6.84 (m, 2H), 4.67 (dd, *J* = 1.6, 4.0 Hz, 1H), 3.78-3.83 (m, 1H), 3.79 (s, 3H), 1.01-1.18 (m, 24H), 0.91 (s, 9H), 0.09 (s, 6H), -0.04 (s, 9H); <sup>13</sup>C NMR (100 MHz, CDCl<sub>3</sub>) δ 2 diastereomers: 158.6, 142.4, 141.6, 133.2, 129.7, 129.5, 113.1, 79.4, 72.0, 55.2, 26.2, 26.0, 18.4, 18.3, 18.2, 18.1, 14.7, 12.8, 12.4, 1.3, 0.66, -4.2, -4.3; IR (film) 2964, 2864, 1610, 1507 cm<sup>-1</sup>; HRMS ES<sup>+</sup> (*m/z*): [M+Na]<sup>+</sup> calc for C<sub>30</sub>H<sub>58</sub>O<sub>3</sub>Si<sub>3</sub>, 573.3592; found 573.3566.

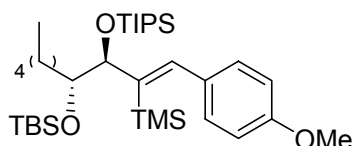

**((3R\*,4R\*,Z)-4-(*tert*-Butyldimethylsiloxy)-1-(4-methoxyphenyl)-3-(triisopropylsiloxy)-2-(trimethylsilyl)non-1-ene (Entry 4)**

Following the general procedure, 2-(*tert*-butyldimethylsilyloxy)heptanal<sup>5</sup> (122 mg, 0.50 mmol), (4-ethoxyphenylethynyl) trimethylsilane (122 mg, 0.60 mmol), Ni(COD)<sub>2</sub> (14 mg, 0.05 mmol), imidazolium salt **1** (17 mg, 0.05 mmol), *t*-BuOK (6 mg, 0.05 mmol) and triisopropylsilane (158 mg, 1.0 mmol) gave, after column chromatography (2 % diethyl ether in hexanes), 242 mg of ((3R\*,4R\*,Z)-4-(*tert*-butyldimethylsilyloxy)-1-(4-methoxyphenyl)-3-(triisopropylsilyloxy)-2-(trimethylsilyl)non-1-ene (81%, dr 98:2) as a colorless oil. <sup>1</sup>H NMR (400 MHz, CDCl<sub>3</sub>) δ 7.59 (s, 1H), 7.08-7.06(m, 2H), 6.80-6.84 (m, 2H), 4.69-4.70 (m, 1H), 3.79 (s, 3H), 3.61-3.64 (m, 1H), 1.62-1.69(m, 1H), 1.36-1.50 (m, 2H), 1.04-1.31 (m, 26H), 0.89 (s, 9H), 0.84 (t, *J* = 6.8 Hz, 3H), 0.09 (s, 3H), 0.08 (s, 3H), -0.03 (s, 9H); <sup>13</sup>C NMR (100 MHz, CDCl<sub>3</sub>) δ 158.6, 142.3, 142.1, 133.3, 129.4, 113.1, 79.6, 76.2, 55.2, 32.3, 29.5, 26.4, 26.2, 22.6, 18.41, 18.37, 14.1, 12.9, 0.94, -3.2, -4.4; IR (film) 2952, 2864, 1610, 1507 cm<sup>-1</sup>; HRMS ES<sup>+</sup> (*m/z*): [M+Na]<sup>+</sup> calc for C<sub>34</sub>H<sub>66</sub>O<sub>3</sub>Si<sub>3</sub>, 629.4218; found 629.4231.

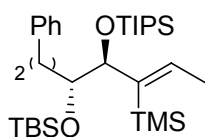

**((4R\*,5R\*,Z)-5-(*tert*-Butyldimethoxysiloxy)-7-(phenyl)-4-(triisopropylsiloxy)-3-(trimethylsilyl)hept-2-ene (Entry 5)**

Following the general procedure, 2-(*tert*-butyldimethylsilyloxy)-4-phenylbutanal<sup>6</sup> (139 mg, 0.50 mmol), 1-(trimethylsilyl)-1-propyne (67 mg, 0.60 mmol), Ni(COD)<sub>2</sub> (14 mg, 0.05 mmol), imidazolium salt **1** (17 mg, 0.05 mmol), *t*-BuOK (6 mg, 0.05 mmol) and triisopropylsilane (158 mg, 1.0 mmol) gave, after column chromatography (hexanes), 182 mg of ((3*R*\*,4*R*\*,*Z*)-5-(*tert*-butyldimethoxysiloxy)-7-(phenyl)-4-(triisopropylsiloxy)-3-(trimethylsilyl)hept-2-ene (85%, dr 98:2) as a colorless oil. <sup>1</sup>H NMR (400 MHz, CDCl<sub>3</sub>) δ 7.21-7.25 (m, 2H), 7.09-7.15 (m, 3H), 6.53 (q, *J* = 7.2 Hz, 1H), 4.5 (m, 1H), 3.50-3.53 (m, 1H), 2.80 (dt, *J* = 4.8, 12.8 Hz, 1H), 2.47 (dt, *J* = 8.6, 12.8 Hz, 1H), 1.85-1.94 (m, 1H), 1.78 (dd, *J* = 1.2, 7.2 Hz, 3H), 1.66-1.76 (m, 1H), 1.00-1.06 (m, 21H), 0.90 (s, 9H), 0.12 (s, 9H), 0.07 (s, 6H); <sup>13</sup>C NMR (100 MHz, CDCl<sub>3</sub>) δ 143.3, 139.6, 138.3, 128.29, 128.26, 125.5, 79.2, 76.0, 32.9, 31.4, 26.2, 18.4, 18.33, 18.31, 17.6, 12.8, 0.23, -3.3, -4.4; IR (flim) 3025, 2945, 2864, 1615 cm<sup>-1</sup>; HRMS ES<sup>+</sup> (*m/z*): [M+Na]<sup>+</sup> calc for C<sub>31</sub>H<sub>60</sub>O<sub>2</sub>Si<sub>3</sub>, 571.3799; found 571.3819.

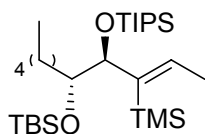

**((4*R*\*,5*R*\*,*Z*)-5-(*tert*-Butyldimethylsilyloxy)-4-(triisopropylsilyloxy)-3-(trimethylsilyl)dec-2-ene (Entry 6)**

Following the general procedure, 2-(*tert*-butyldimethylsilyloxy)heptanal<sup>5</sup> (122 mg, 0.50 mmol), 1-(trimethylsilyl)-1-propyne (67 mg, 0.60 mmol), Ni(COD)<sub>2</sub> (14 mg, 0.05 mmol), imidazolium salt **1** (17 mg, 0.05 mmol), *t*-BuOK (6 mg, 0.05 mmol) and triisopropylsilane (158 mg, 1.0 mmol) gave, after column chromatography (hexanes), 218 mg of ((4*R*\*,5*R*\*,*Z*)-5-(*tert*-butyldimethylsilyloxy)-4-(triisopropylsilyloxy)-3-

(trimethylsilyl)dec-2-ene (85%, dr 98:2) as a colorless oil.  $^1\text{H}$  NMR (400 MHz,  $\text{CDCl}_3$ )  $\delta$  6.48 (dq,  $J = 1.6, 7.2$  Hz, 1H), 4.44 (m, 1H), 3.46 (ddd,  $J = 2.4, 3.6, 6$  Hz, 1H), 1.77 (dd,  $J = 1.2, 7.2$  Hz, 3H), 1.53- 1.62 (m, 1H), 1.12-1.44 (m, 7H), 1.02-1.05 (m, 21H), 0.86 (s, 9H), 0.84 (t,  $J = 7.2$  Hz, 3H), 0.14 (s, 9H), 0.04 (s, 3H), 0.03 (s, 3H);  $^{13}\text{C}$  NMR (100 MHz,  $\text{CDCl}_3$ )  $\delta$  139.8, 138.4, 79.5, 76.8, 32.3, 30.0, 26.3, 26.2, 22.6, 18.4, 18.3, 17.5, 14.0, 12.9, 0.39, -3.3, -4.3; IR (flim) 2929, 2864, 1651  $\text{cm}^{-1}$ ; HRMS  $\text{ES}^+$  ( $m/z$ ):  $[\text{M}+\text{Na}]^+$  calc for  $\text{C}_{28}\text{H}_{62}\text{O}_2\text{Si}_3$ , 537.3955; found 537.3973.

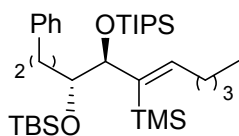

**((7R\*,8R\*,Z)-8-(tert-Butyldimethylsilyloxy)-10-(phenyl)-7-(triisopropylsilyloxy)-6-(trimethylsilyl)dec-5-ene (Entry 7)**

Following the general procedure, 2-(tert-butyldimethylsilyloxy)-4-phenylbutanal<sup>6</sup> (139 mg, 0.50 mmol), 1-(trimethylsilyl)-1-hexyne (92 mg, 0.60 mmol),  $\text{Ni}(\text{COD})_2$  (14 mg, 0.05 mmol), imidazolium salt **1** (17 mg, 0.05 mmol), *t*-BuOK (6 mg, 0.05 mmol) and triisopropylsilane (158 mg, 1.0 mmol) gave, after column chromatography (hexanes), 249 mg of ((7R\*,8R\*,Z)-8-(tert-butyldimethylsilyloxy)-10-(phenyl)-7-(triisopropylsilyloxy)-6-(trimethylsilyl)dec-5-ene (85%, dr 98:2) as a colorless oil.  $^1\text{H}$  NMR (400 MHz,  $\text{CDCl}_3$ )  $\delta$  7.13-7.17 (m, 2H), 7.01-7.07 (m, 3H), 6.40 (t,  $J = 7.2$  Hz, 1H), 4.44 (m, 1H), 3.42-3.45 (m, 1H), 2.74 (ddd,  $J = 4.8, 12.0, 13.2$  Hz, 1H), 2.39 (ddd,  $J = 5.6, 12.0, 13.2$  Hz, 1H), 2.00-2.11 (m, 2H), 1.78-1.87 (m, 1H), 1.58-1.68 (m, 1H), 1.21-1.28 (m, 4H), 0.94-0.98 (m, 21H), 0.83 (s, 9H), 0.79 (t,  $J = 7.2$  Hz, 3H), 0.03 (s, 9H), 0.00 (s, 6H);  $^{13}\text{C}$  NMR (100 MHz,  $\text{CDCl}_3$ )  $\delta$  144.3, 143.3, 138.2, 128.3, 128.2, 125.5, 79.0, 76.0, 33.0, 32.0,

31.8, 26.2, 22.6, 18.41, 18.38, 18.36, 14.0, 12.8, 0.48, -3.2, -4.4; IR (film) 3026, 2955, 2864, 1610  $\text{cm}^{-1}$ ; HRMS  $\text{ES}^+$  ( $m/z$ ):  $[\text{M}+\text{Na}]^+$  calc for  $\text{C}_{34}\text{H}_{66}\text{O}_2\text{Si}_3$ , 613.4268; found 613.4255.

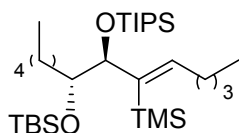

**((7*R*\*,8*R*\*,*Z*)-8-(*tert*-Butyldimethylsiloxy)-7-(triisopropylsiloxy)-6-(trimethylsilyl))tridec-5-ene (Entry 8)**

Following the general procedure, 2-(*tert*-butyldimethylsilyloxy)heptanal<sup>5</sup> (122 mg, 0.50 mmol), 1-(trimethylsilyl)-1-hexyne (92 mg, 0.60 mmol),  $\text{Ni}(\text{COD})_2$  (14 mg, 0.05 mmol), imidazolium salt **1** (17 mg, 0.05 mmol), *t*-BuOK (6 mg, 0.05 mmol) and triisopropylsilane (158 mg, 1.0 mmol) gave, after column chromatography (hexanes), 216 mg of ((7*R*\*,8*R*\*,*Z*)-8-(*tert*-butyldimethylsilyloxy)-7-(triisopropylsilyloxy)-6-(trimethylsilyl))tridec-5-ene (78%, dr 98:2) as a colorless oil.  $^1\text{H}$  NMR (500 MHz,  $\text{C}_6\text{D}_6$ )  $\delta$  6.65-6.74 (m, 1H), 4.71(m, 1H), 3.66-3.73 (m, 1H), 2.23 (septet,  $J = 7.3\text{Hz}$ , 2H), 1.86-1.92 (m, 1H), 1.62-1.71 (m, 2H), 1.27-1.46 (m, 9H), 1.21-1.25 (m, 21H), 1.06 (s, 9H), 0.90 (t,  $J = 7.0\text{ Hz}$ , 3H), 0.89 (t,  $J = 7.0\text{ Hz}$ , 3H), 0.28 (s, 9H), 0.24 (s, 3H), 0.20 (s, 3H);  $^{13}\text{C}$  NMR (125 MHz,  $\text{C}_6\text{D}_6$ )  $\delta$  144.7, 128.3, 79.8, 77.0, 32.6, 32.4, 32.2, 27.0, 26.5, 23.0, 22.9, 18.70, 18.69, 14.3, 14.2, 13.3, 0.76, -3.0, -4.1; IR (film) 2955, 1612  $\text{cm}^{-1}$ ; HRMS  $\text{ES}^+$  ( $m/z$ ):  $[\text{M}+\text{Na}]^+$  calc for  $\text{C}_{31}\text{H}_{68}\text{O}_2\text{Si}_3$ , 579.4425; found 579.4414.

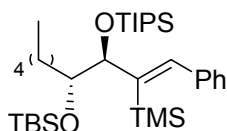

**((3*R*\*,4*R*\*,*Z*)-4-(*tert*-Butyldimethylsiloxy)-1-(phenyl)-3-(triisopropylsiloxy)-2-(trimethylsilyl)non-2-ene (Entry 9)**

Following the general procedure, 2-(*tert*-butyldimethylsilyloxy)heptanal<sup>5</sup> (122 mg, 0.50 mmol), 1-phenyl-2-(trimethylsilyl)acetylene (104 mg, 0.60 mmol), Ni(COD)<sub>2</sub> (14 mg, 0.05 mmol), imidazolium salt **1** (17.0 mg, 0.05 mmol), *t*-BuOK (6 mg, 0.05 mmol) and triisopropylsilane (158 mg, 1.0 mmol) gave, after column chromatography (hexanes), 238 mg of ((3*R*\*,4*R*\*,*Z*)-4-(*tert*-butyldimethylsiloxy)-1-(phenyl)-3-(triisopropylsiloxy)-2-(trimethylsilyl)non-2-ene (83%, dr 98:2) as a colorless oil. <sup>1</sup>H NMR (400 MHz, CDCl<sub>3</sub>) δ 7.64 (s, 1H), 7.18-7.728 (m, 3H), 7.11-7.13 (m, 2H), 4.70(t, *J* = 1.6 Hz, 1H), 3.61-3.64(m, 1H), 1.61-1.68 (m, 1H), 1.36-1.48 (m, 2H), 1.05-1.29 (m, 26H), 0.87 (s, 9H), 0.82 (t, *J* = 7 Hz, 3H), 0.78 (s, 3H), 0.68 (s, 3H), 0.08 (s, 9H); <sup>13</sup>C NMR (100 MHz, CDCl<sub>3</sub>) δ 143.4, 142.5, 140.9, 128.3, 127.8, 126.8, 79.7, 76.1, 32.3, 29.4, 26.5, 26.2, 22.6, 19.4, 18.41, 18.38, 14.1, 12.9, 10.2, 0.87, -3.2, -4.4; IR (flim) 3058, 3023, 2954, 2865, 1593 cm<sup>-1</sup>; HRMS ES<sup>+</sup> (*m/z*): [M+Na]<sup>+</sup> calc for C<sub>33</sub>H<sub>64</sub>O<sub>2</sub>Si<sub>3</sub>, 599.4112; found 599.4101.



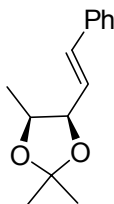

### Compound 3a

#### (4*S*,5*R*)-2,2,4-Trimethyl-5-styryl-1,3-dioxolane

*n*-Bu<sub>4</sub>NF (1.2 mL of a 1.0 M THF solution) was added to dissolve (3*S*,4*S*,*Z*)-4-(*tert*-butyldimethylsiloxy)-3-(triisopropylsiloxy)-2-(trimethylsilyl)pent-1-enyl)benzene (**2a**) (104 mg, 0.20 mmol) at rt. The reaction solution was stirred for 3 h. The reaction mixture was quenched with 50% sodium bicarbonate solution and extracted with ethyl acetate (10 mL) three times. The combined organic layer was washed with brine and dried over magnesium sulfate, filtered and concentrated *in vacuo*. The residue was purified via flash column chromatography (50 % ethyl acetate in hexanes) to afford 174 mg of (2*S*, 3*R*, *E*)-5-phenylpent-4-ene-2, 3-diol (98%) as a white solid. The spectral data were identical to the previous report.<sup>7</sup> TsOH·H<sub>2</sub>O (2 mg, 0.01 mmol) was added to the solution of (2*S*,3*R*,*E*)-5-phenylpent-4-ene-2, 3-diol (20 mg, 0.12 mmol) in dichloromethane at rt, followed with dimethoxypropane (64 mg, 0.020 mmol). The reaction mixture was stirred for 3 h. The reaction mixture was quenched with 50% sodium bicarbonate solution and was extracted with diethyl ether three times. The combined organic layer was washed with brine, dried over magnesium sulfate, filtered and concentrated *in vacuo*. The residue was purified via flash chromatography ( 2 % diethyl ether in hexanes) to afford 23 mg of (4*S*,5*R*)-2,2,4-trimethyl-5-styryl-1,3-dioxolane (**2b**) ( 89%) as a colorless oil. <sup>1</sup>H NMR (400 MHz, CDCl<sub>3</sub>) δ 7.36-7.37 (m, 2H), 7.27-7.31 (m, 2H), 7.20-7.24 (m, 1H), 6.58 (d, *J*

= 16.0 Hz, 1H), 6.13 (dd,  $J = 8.0, 16.0$  Hz, 1H), 4.64 (dd,  $J = 8.0, 7.2$  Hz, 1H), 4.37 (quint,  $J = 6.3$  Hz, 1H), 1.52 (s, 3H), 1.38 (s, 3H), 1.16 (d,  $J = 6.4$  Hz, 3H);  $^{13}\text{C}$  NMR (100 MHz,  $\text{CDCl}_3$ )  $\delta$  136.5, 133.2, 128.5, 127.8, 126.6, 125.7, 108.1, 79.8, 74.4, 28.3, 25.6, 16.2; IR (film) 3025, 2983, 1948, 1733, 1653, 1599  $\text{cm}^{-1}$ ; HRMS EI ( $m/z$ ):  $[\text{M}]^+$  calc for  $\text{C}_{14}\text{H}_{18}\text{O}_2$ , 218.1307; found 218.1304.

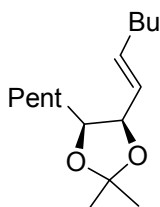

### Compound 3b

#### **(4*R*<sup>\*</sup>,5*S*<sup>\*</sup>)-4-((*E*)-hex-1-enyl)-2,2-dimethyl-5-pentyl-1,3-dioxolane**

*n*-Bu<sub>4</sub>NF (1.8 mL of a 1.0 M THF solution)) was added to dissolve compound **2b** (100 mg, 0.18 mmol) at 45 °C. The reaction solution was stirred for 3 h. The reaction mixture was quenched with 50% sodium bicarbonate solution and extracted with ethyl acetate (10 mL) three times. The combined organic layer was washed with brine and dried over magnesium sulfate, filtered and concentrated *in vacuo* to obtain yellow oil. The residue was dissolved in dichloromethane (1 mL), followed with addition of TsOH·H<sub>2</sub>O (2 mg, 0.01 mmol) and dimethoxypropane (94 mg, 0.90 mmol) at rt to give a brown resulting solution after stirring for 2 h. The reaction mixture was quenched with 50% sodium bicarbonate solution and was extracted with diethyl ether (10 mL) three times. The combined organic layer was washed with brine, dried over magnesium sulfate, filtered and concentrated *in vacuo*. The residue was purified via flash chromatography ( 2 % diethyl ether in hexanes) to afford 29 mg of (4*R*<sup>\*</sup>,5*S*<sup>\*</sup>)-4-((*E*)-hex-1-enyl)-2,2-dimethyl-5-

pentyl-1,3-dioxolane (**3b**) (89%) as a colorless oil.  $^1\text{H}$  NMR (400 MHz,  $\text{CDCl}_3$ )  $\delta$  5.65 (td,  $J = 6.8, 15.2$  Hz, 1H), 5.39 (tdd,  $J = 1.6, 8.4, 15.2$  Hz, 1H), 4.39 (dd,  $J = 6.0, 8.4$  Hz, 1H), 4.00-4.06 (m, 1H), 1.97-2.05 (m, 2H), 1.42 (s, 3H), 1.30 (s, 3H), 1.20-1.52 (m, 12H), 0.82-0.88 (m, 6H);  $^{13}\text{C}$  NMR (100 MHz,  $\text{CDCl}_3$ )  $\delta$  135.6, 126.0, 107.6, 79.8, 78.4, 32.0, 31.9, 31.1, 30.4, 28.4, 25.8, 25.7, 22.5, 22.2, 14.0, 13.9; IR (film) 2930, 2859, 1669  $\text{cm}^{-1}$ ; HRMS EI ( $m/z$ ):  $[\text{M-Me}]^+$  calc for  $\text{C}_{15}\text{H}_{27}\text{O}_2$ , 239.2011; found 239.2010.

### Stereochemical Characterization of Table 1 Entry 3

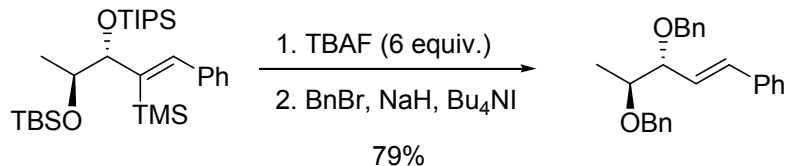

#### (3R,4S,E)-3,4-Dibenzyloxy-1-phenylpent-1-ene

*n*-Bu<sub>4</sub>NF (1.2 mL of a 1.0 M THF solution) was added to dissolve compound (3S,4S,Z)-4-(*tert*-butyldimethylsilyloxy)-1-phenyl-3-(triisopropylsilyloxy)-2-(trimethylsilyl)pent-1-ene (**2a**) (104 mg, 0.20 mmol) at rt. The reaction solution was stirred for 3 h. The reaction mixture was quenched with 50% sodium bicarbonate solution and extracted with ethyl acetate (10 mL) three times. The combined organic layer was washed with brine and dried over magnesium sulfate, filtered and concentrated *in vacuo* to afford a brown oil. The residue was dissolved in THF (1.0 mL) and added to the reaction flask which contained NaH (15 mg, 0.62 mmol) and Bu<sub>4</sub>NI (7 mg, 0.02 mmol) in THF (2 mL) at rt, followed by addition of benzylbromide (102 mg, 0.60 mmol). The resulting yellow solution was stirred at rt for 4 h. The reaction mixture was quenched with 50% sodium bicarbonate and extracted with diethyl ether (5 mL) three times. The combined organic layer was washed with brine and dried over magnesium sulfate, filtered and concentrated *in vacuo*. The residue was purified via flash column chromatography (5 % diethyl ether in hexanes) to afford (3R,4S,E)-3,4-dibenzyloxy-1-phenylpent-1-ene 56 mg (79%) as a light yellow oil. <sup>1</sup>H NMR (400 MHz, CDCl<sub>3</sub>) δ 7.20-7.40 (m, 15H), 6.57 (d, *J* = 16.0 Hz, 1H), 6.20 (ddd, *J* = 0.8, 8.0, 16.0 Hz, 1H), 4.67 (d, *J* = 12.0 Hz, 1H), 4.60 (d, *J* = 12.4 Hz, 1H), , 4.58 (d, *J* = 12.4 Hz, 1H), 4.44 (d, *J* = 12.0 Hz, 1H), 3.91 (dd, *J* = 4.8, 8.0 Hz, 1H), 3.67 (quint, *J* = 6.0 Hz, 1H), 1.23 (d, *J* = 6.0 Hz, 1H); <sup>13</sup>C NMR (100 MHz,

CDCl<sub>3</sub>) δ 138.8, 138.6, 136.6, 133.9, 128.6, 128.3, 128.2, 127.73, 127.70, 127.66, 127.41, 127.38, 126.6, 83.1, 77.3, 71.4, 70.4, 16.4; IR (film) 3027, 2971, 1949, 1877, 1806, 1717, 1651, 1599 cm<sup>-1</sup>; ; HRMS ES<sup>+</sup> (*m/z*): [M+Na]<sup>+</sup> calc for C<sub>25</sub>H<sub>26</sub>O<sub>2</sub>, 381.1830; found 381.1824.

### Stereochemical Characterization from Table 1 Entry 4

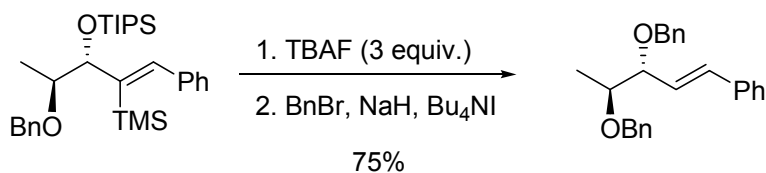

### (3R,4S,E)-3,4-Dibenzoyloxy-1-phenylpent-1-ene

*n*-Bu<sub>4</sub>NF (0.6 mL of a 1.0 M THF solution) was added to dissolve ((3*S*,4*S*,*Z*)-4-(benzyloxy)-1-(phenyl)-3-(triisopropylsiloxy)-2-(trimethylsilyl)non-2-ene (**table 1 entry 4**) (99 mg, 0.20 mmol) at rt. The reaction solution was stirred for 3 h. The reaction mixture was quenched with 50% sodium bicarbonate solution and extracted with ethyl acetate (10 mL) three times. The combined organic layer was washed with brine and dried over magnesium sulfate, filtered and concentrated *in vacuo* to afford a yellow oil. The residue was dissolved in THF (1.0 mL) and added to the reaction flask which contained NaH (15 mg, 0.62 mmol) and Bu<sub>4</sub>NI (7 mg, 0.02 mmol) in THF (2 mL) at rt, followed with addition of benzylbromide (102 mg, 0.60 mmol). The resulting yellow solution was stirred at rt for 4 h. The reaction mixture was quenched with 50% sodium bicarbonate solution and extracted with diethyl ether (5 mL) three times. The combined organic layer was washed with brine and dried over magnesium sulfate, filtered and concentrated *in vacuo*. The residue was purified via flash column chromatography (5 %

diethyl ether in hexanes) to afford (3*R*,4*S*,*E*)-3,4-dibenzyloxy-1-phenylpent-1-ene 53 mg (75%) as a light yellow oil.

The major product was identical to that obtained from **Table 1, entry 3**.

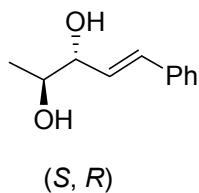

### Compound 5

#### (2*S*, 3*R*, *E*)-5-phenylpent-4-ene-2, 3-diol

Beginning from compound **4** (>98 % ee) derived from (*S*)-ethyl lactate, compound **5** was prepared by the procedure given previously in the experimental for compound **3a**. Chiral HPLC analysis (Agilent 1100 series, Chiralcel OD-H, 20% isopropanol in hexane, 1 mL/min) comparing this product to the racemate indicated >98% ee product was obtained.

## References:

1. Preparation of **Imes (1)**: Voges, M., H.; Romming, C.; Tilset, M. *Organometallics* **1999**, *18*, 529.
2. (*S*)-2-(tert-butyldimethylsilyloxy)propanal; 2-(tert-butyldimethylsilyloxy)propanal: Hirama, M.; Shigemoto, T.; Ito, S. *J. Org. Chem.* **1987**, *52*, 3342.
3. (*S*)-2-(benzyloxy)propanal; Wuts, G. M. P.; Bigelow, S. S. *J. Org. Chem.* **1983**, *48*, 3489.
4. (*S*)-2-(triethylsilyloxy)propanal; (*S*)-2-(triisopropylsilyloxy)propanal: Cainelli, G.; Panunzio, M.; Bandini, E.; Marteli, G.; Spunta, G. *Tetrahedron* **1996**, *52*, 1685.
5. 2-(tert-butyldimethylsilyloxy)heptanal: Nicolaou, K. C.; Marron, B. E.; Veale, C. A.; Webber, S. E.; Serhan, C. N. *J. Org. Chem.* **1989**, *54*, 5527.
6. 2-((tert-butyldimethylsilyl)methyl)-4-phenylbutanal: Belotti, B. D; Pradaux, F. A.; BouzBouz, S.; Cossy, J. *Tetrahedron Lett.* **2003**, *44*, 3613.
7. Fujita, M.; Hiyama, T. *J. Org. Chem.* **1988**, *53*, 5405.

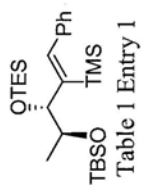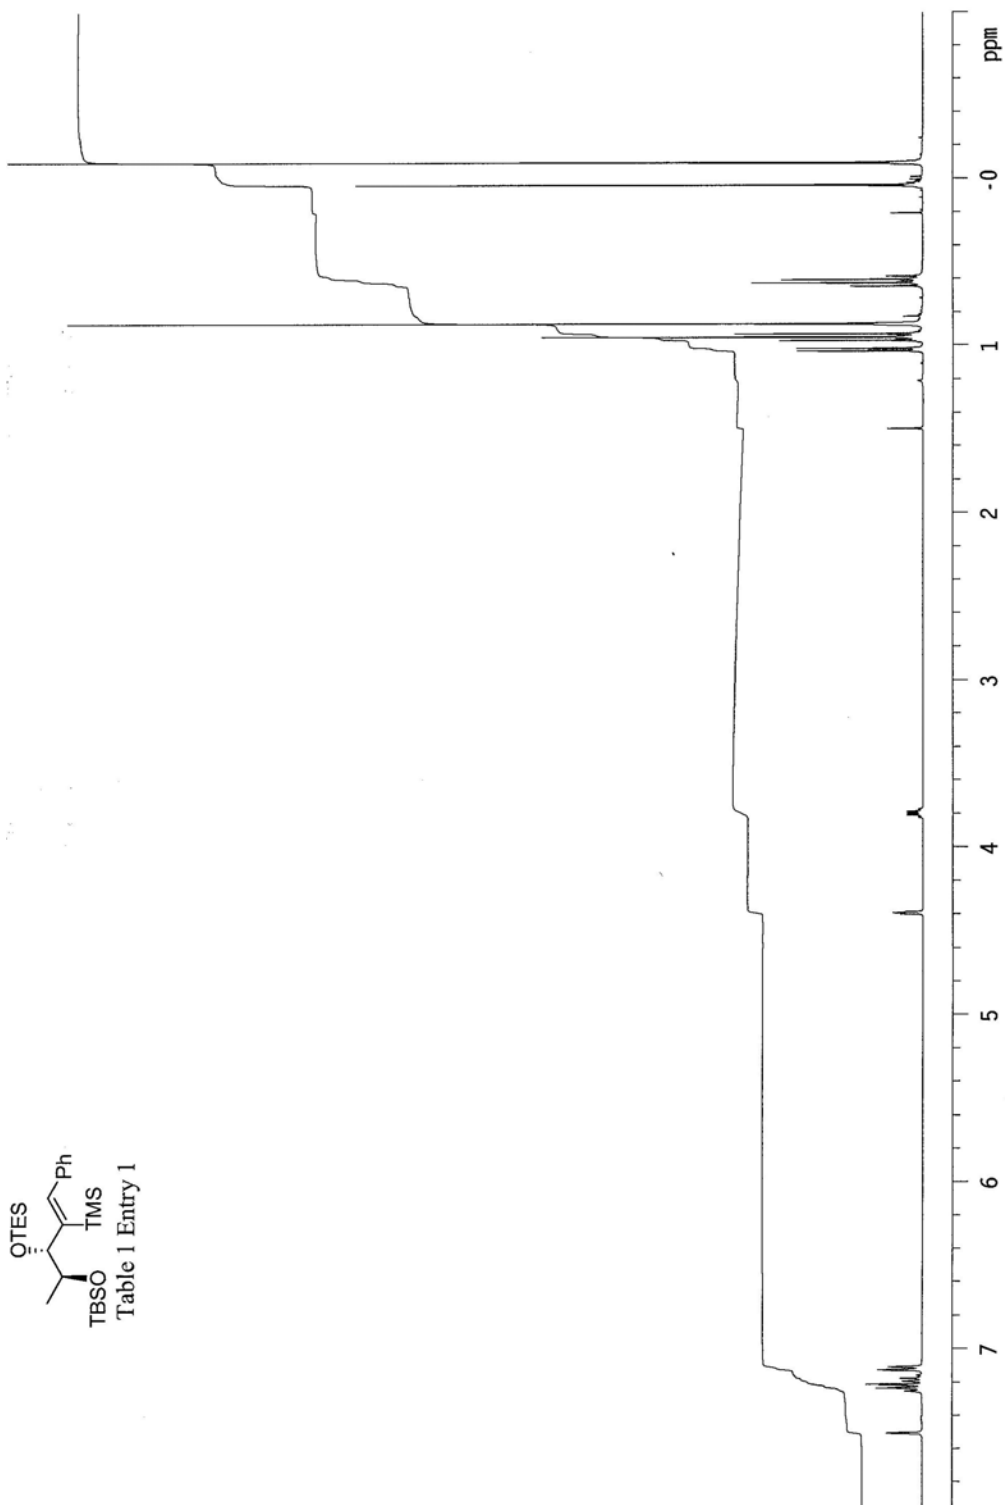



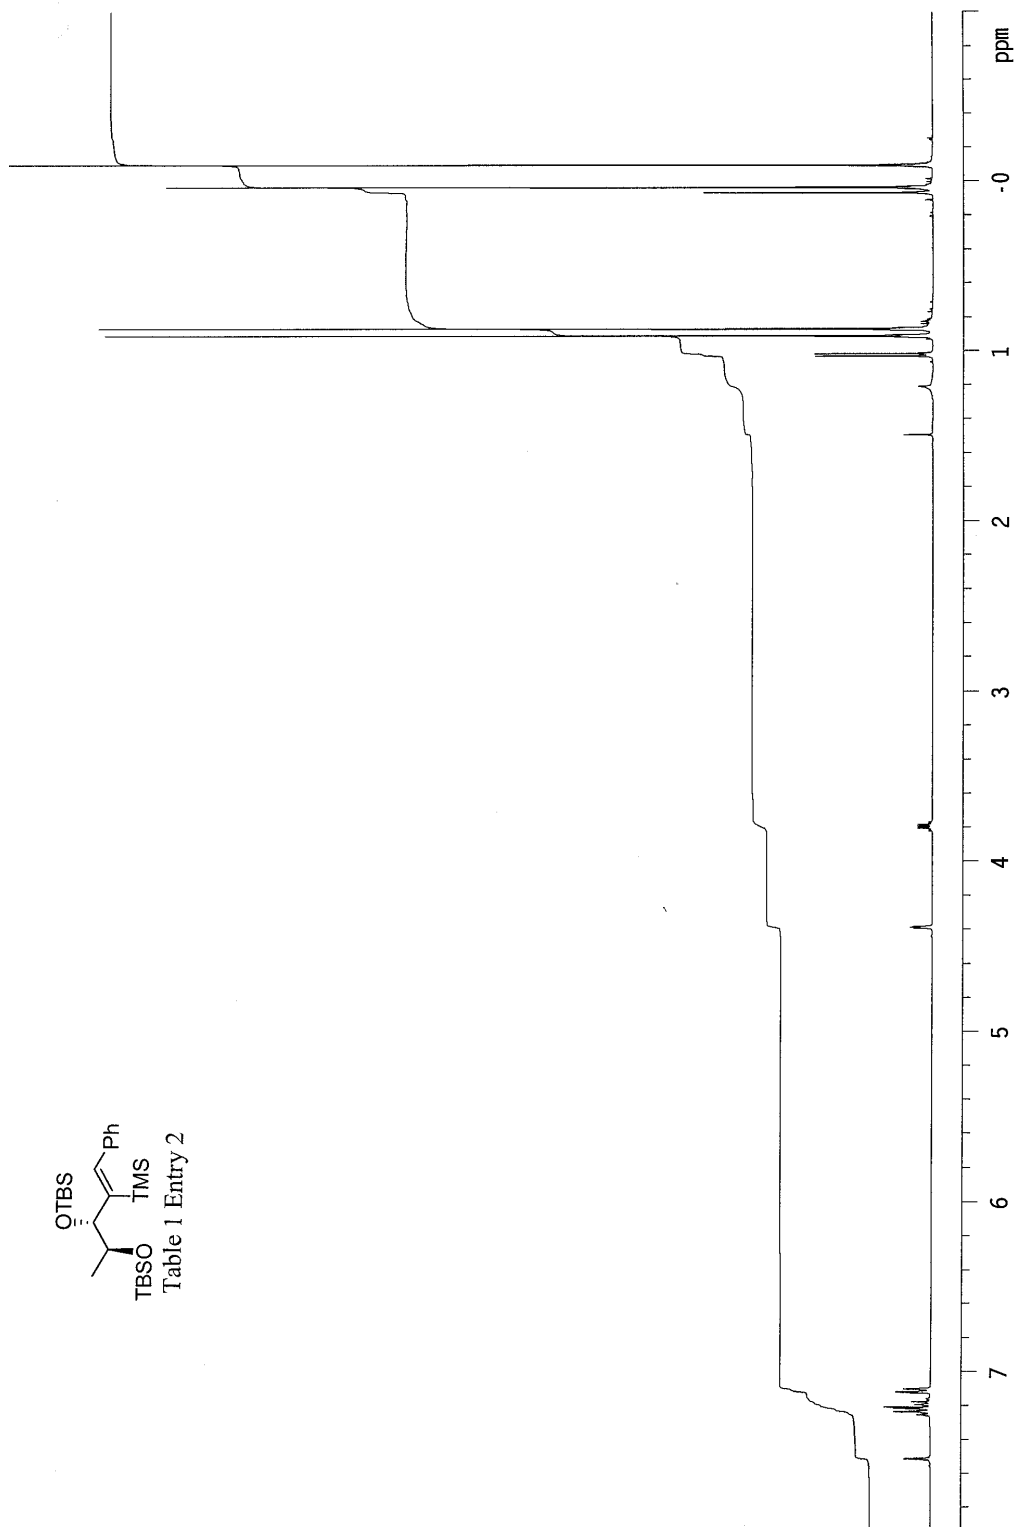

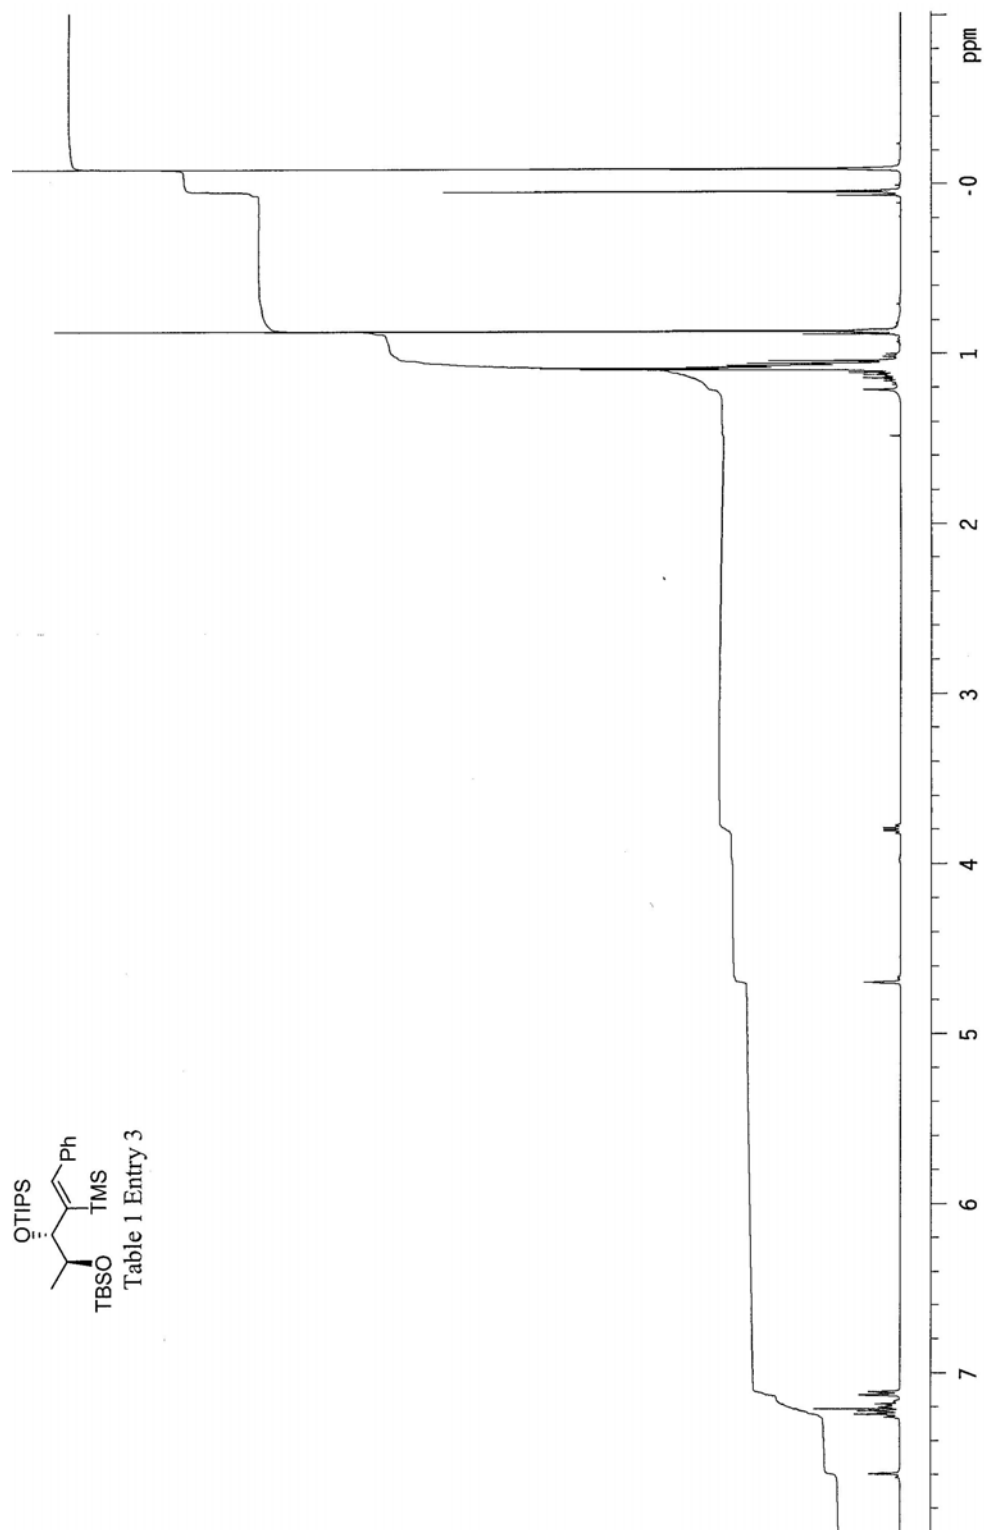

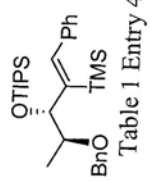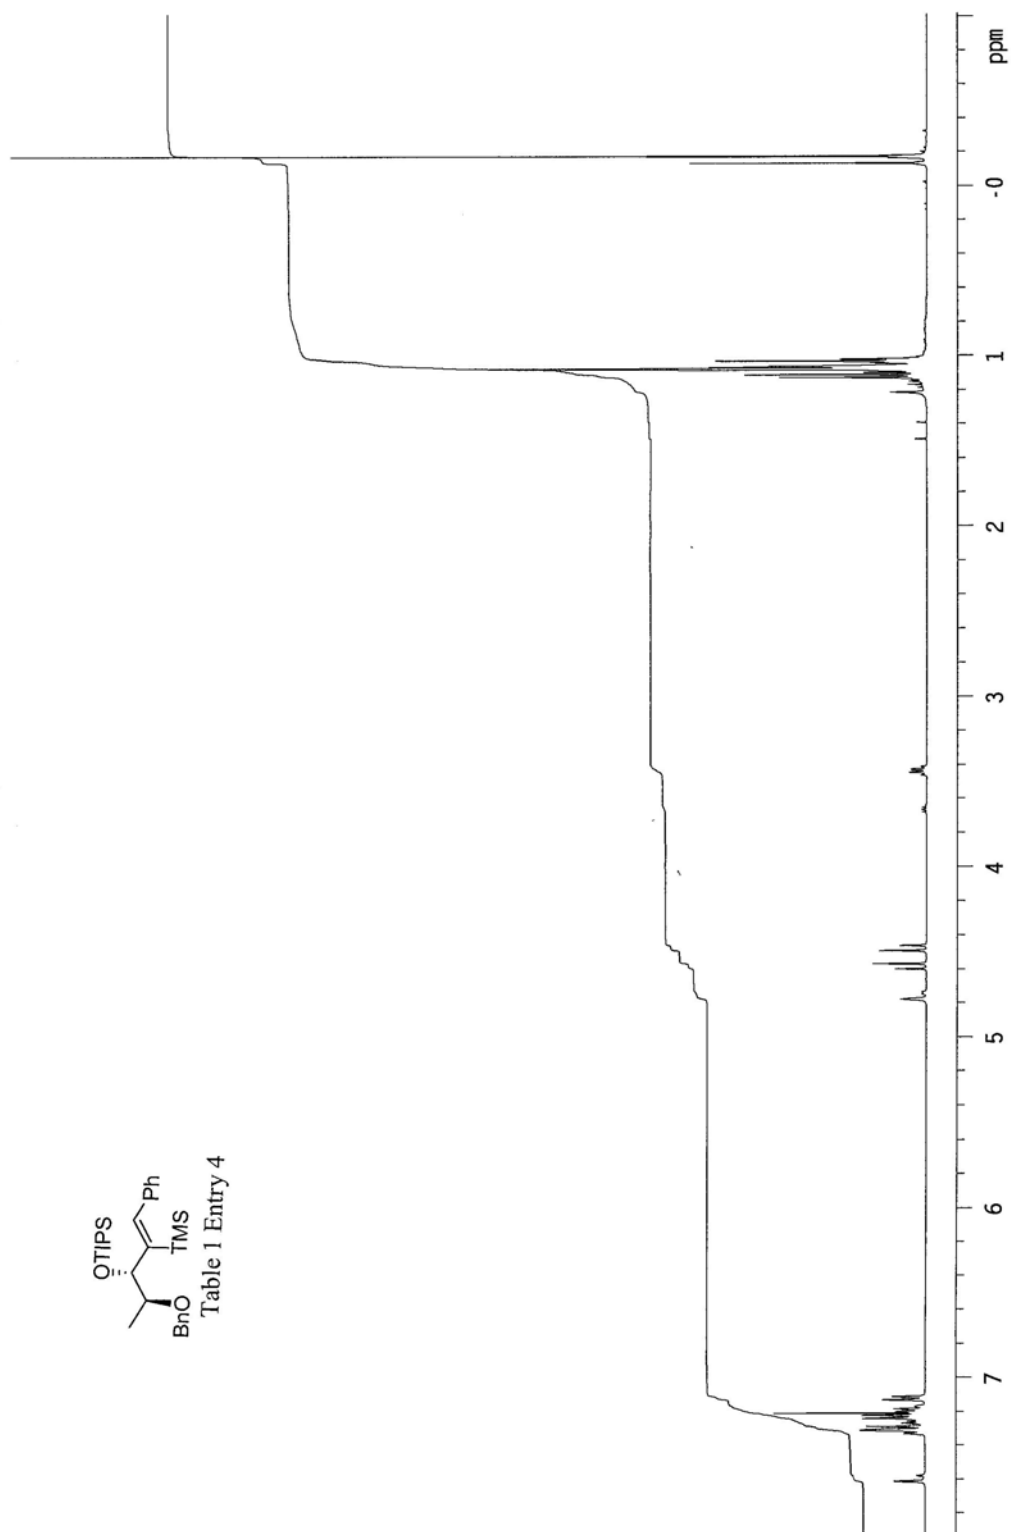

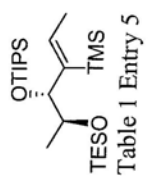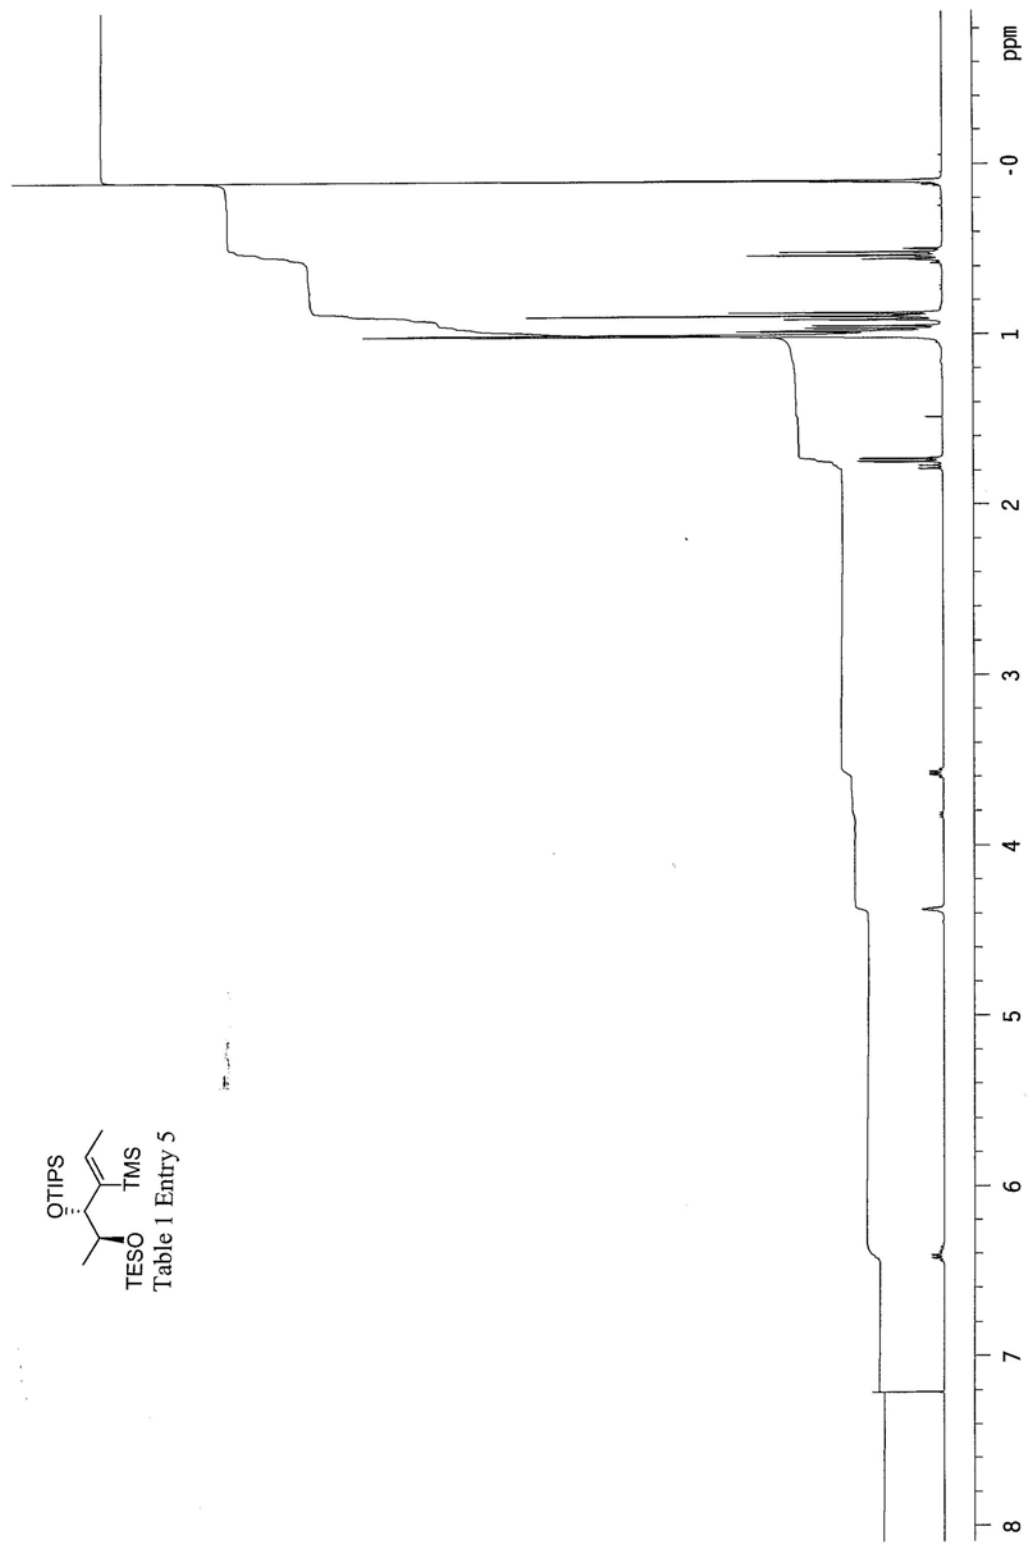

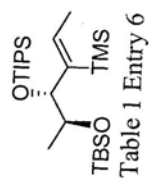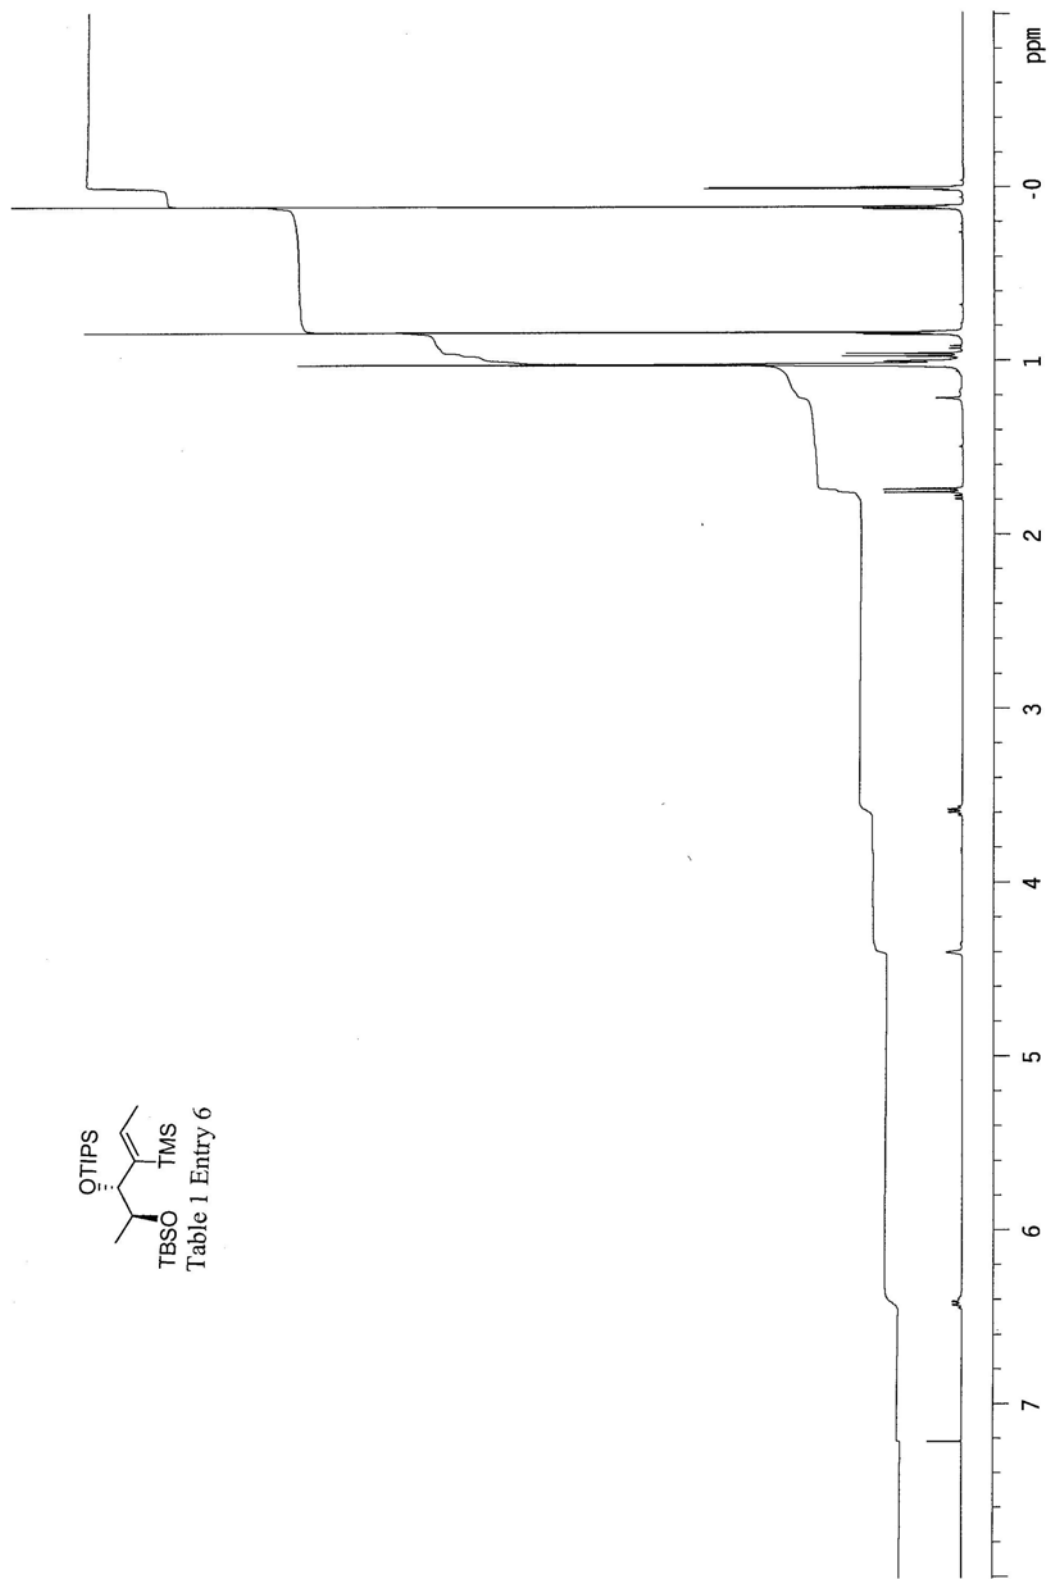

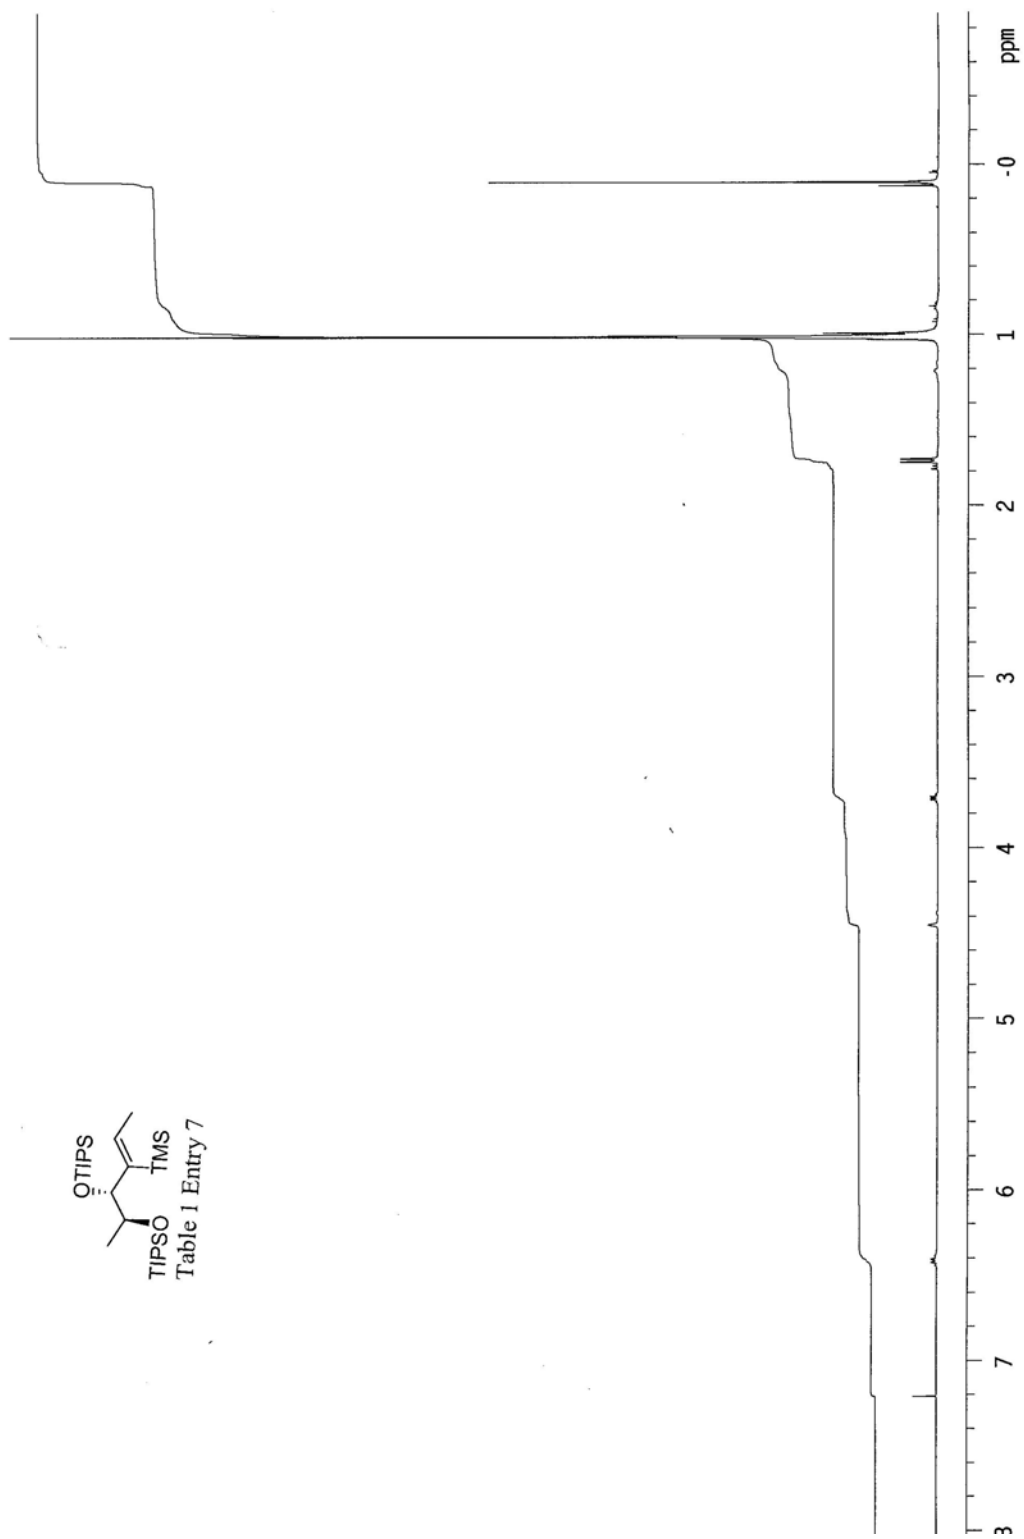

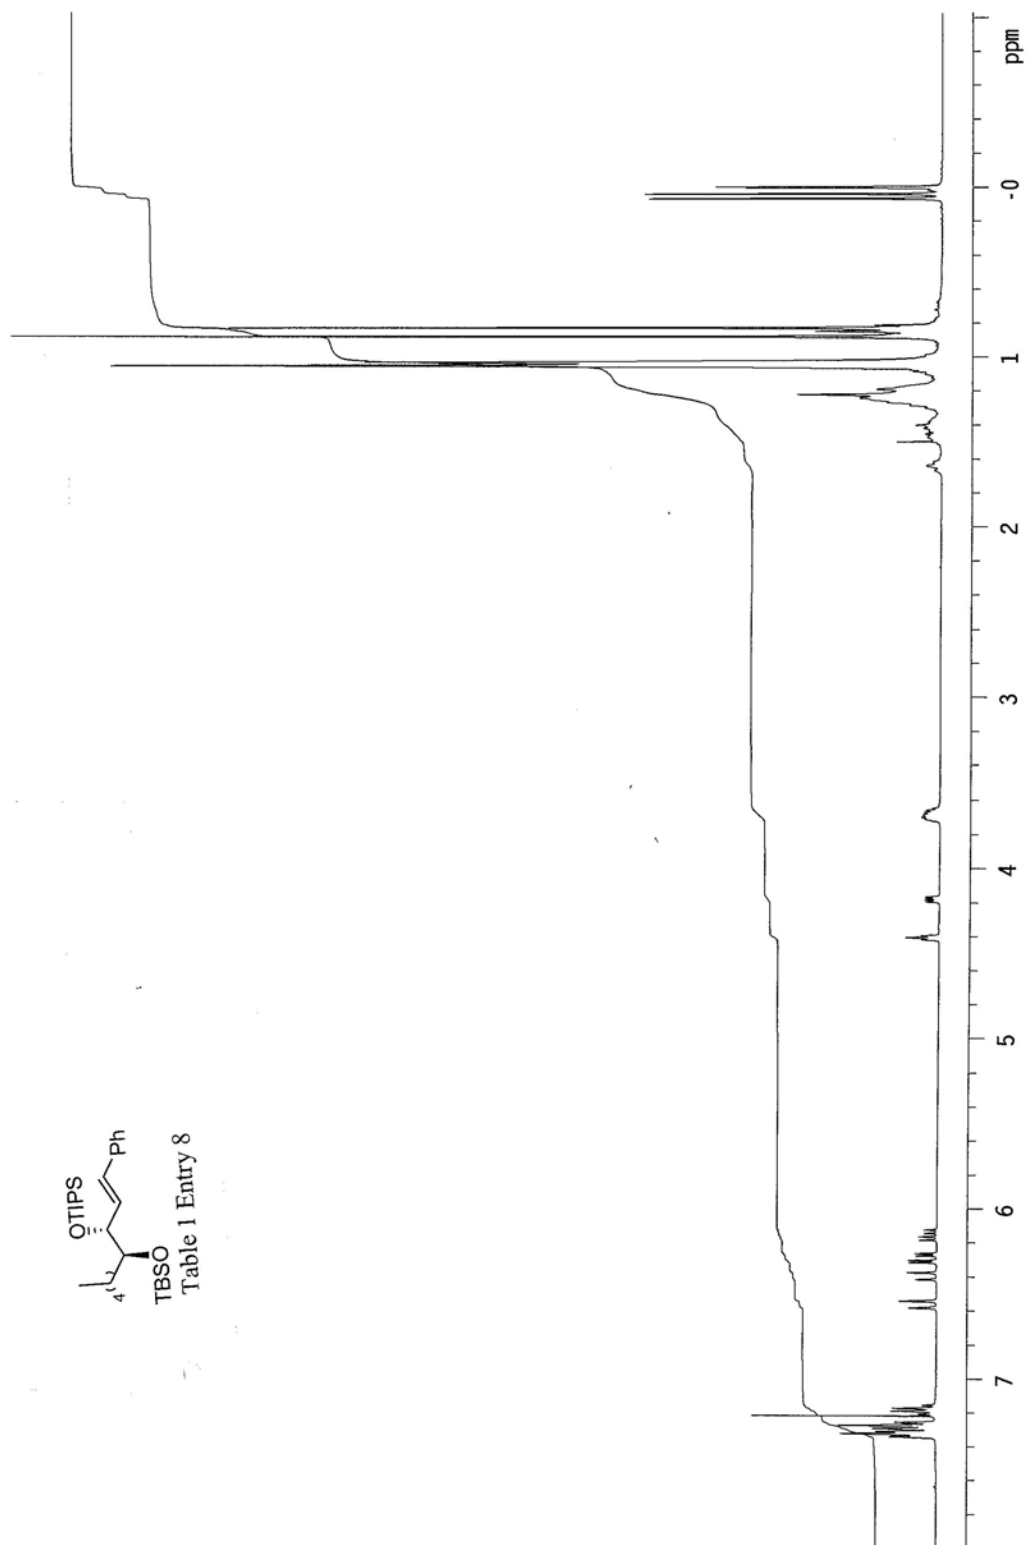

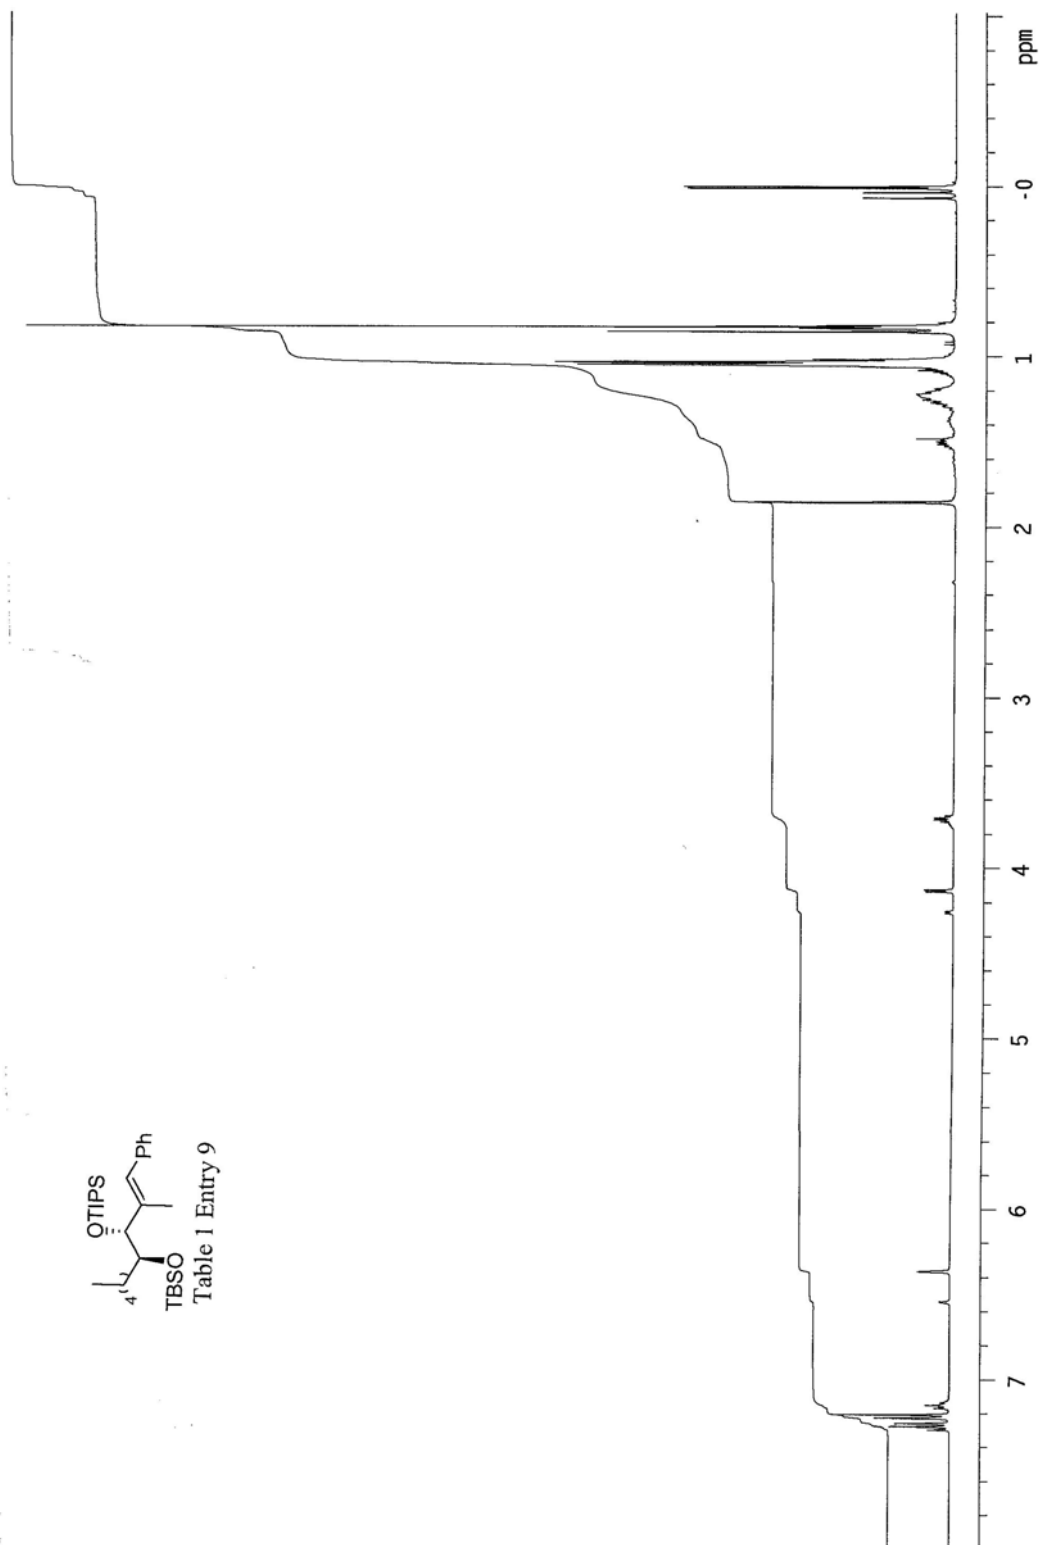



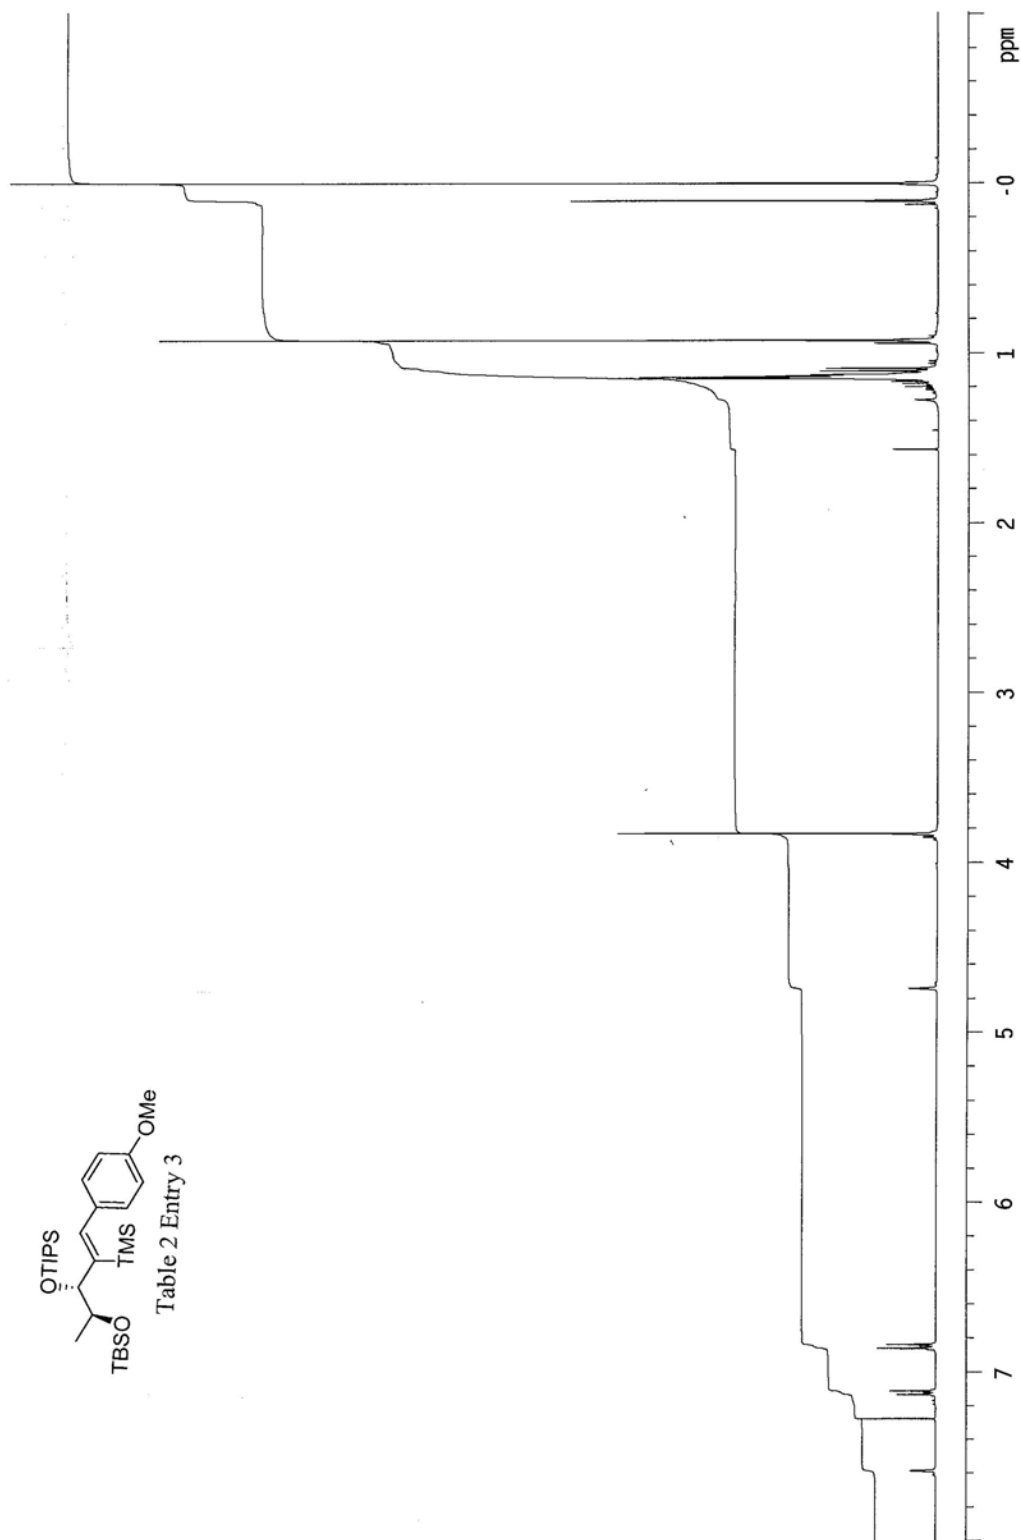

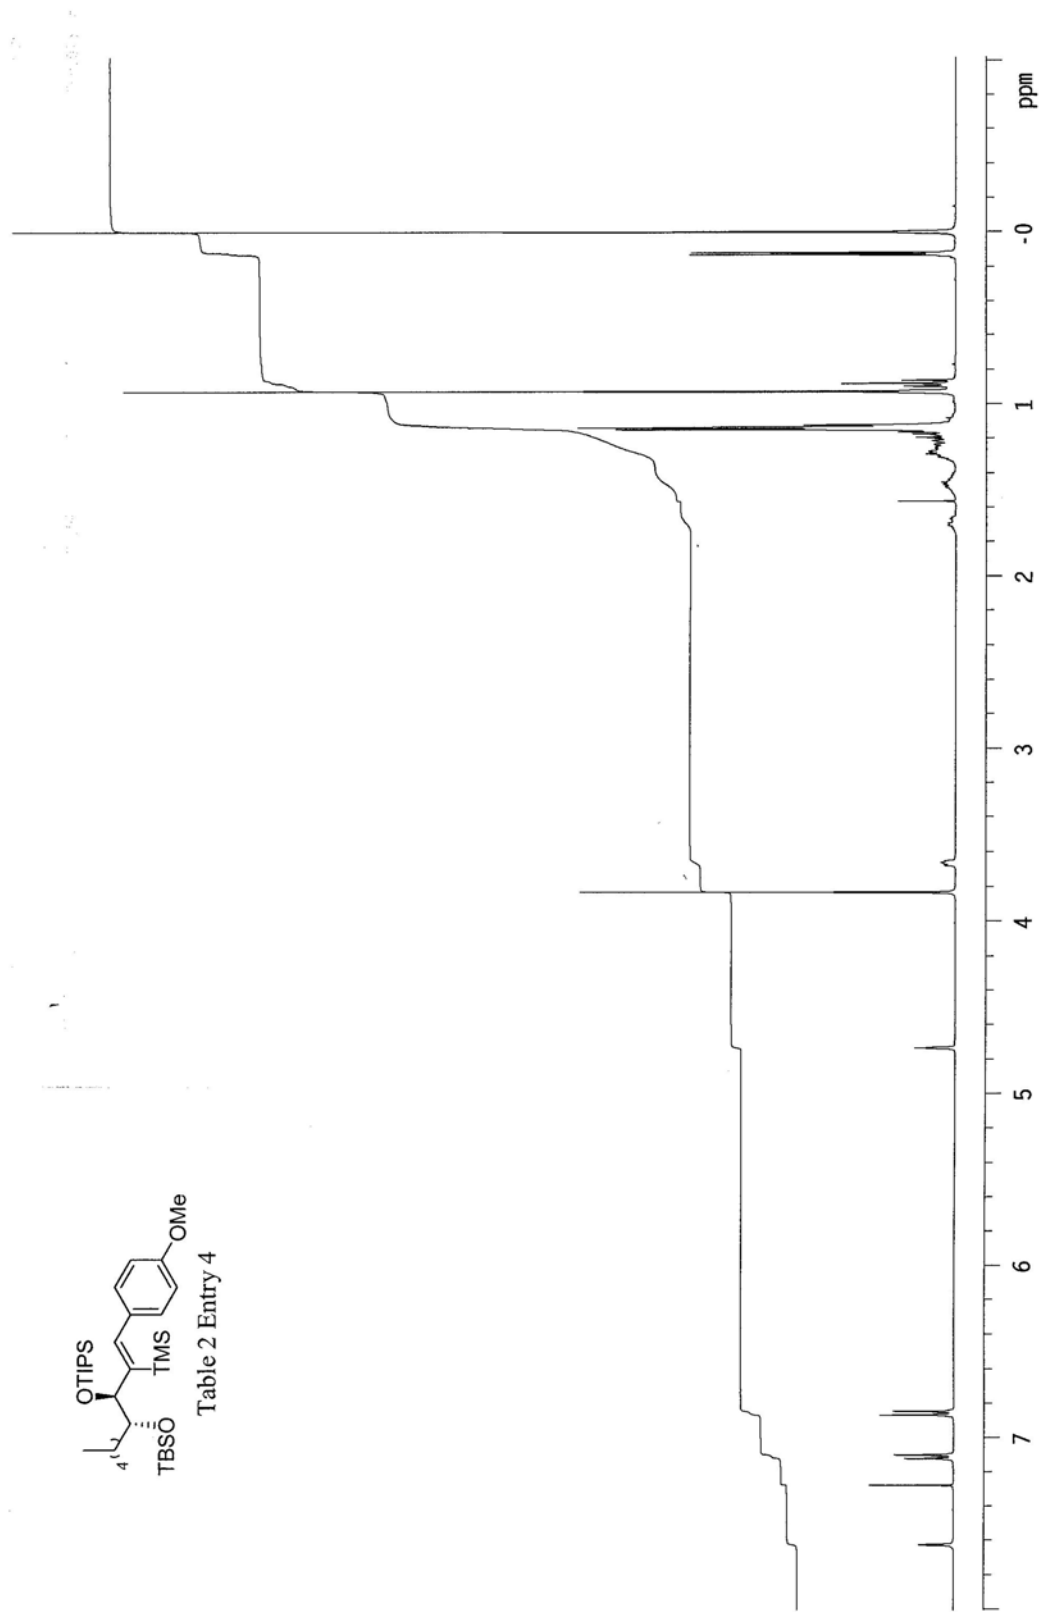

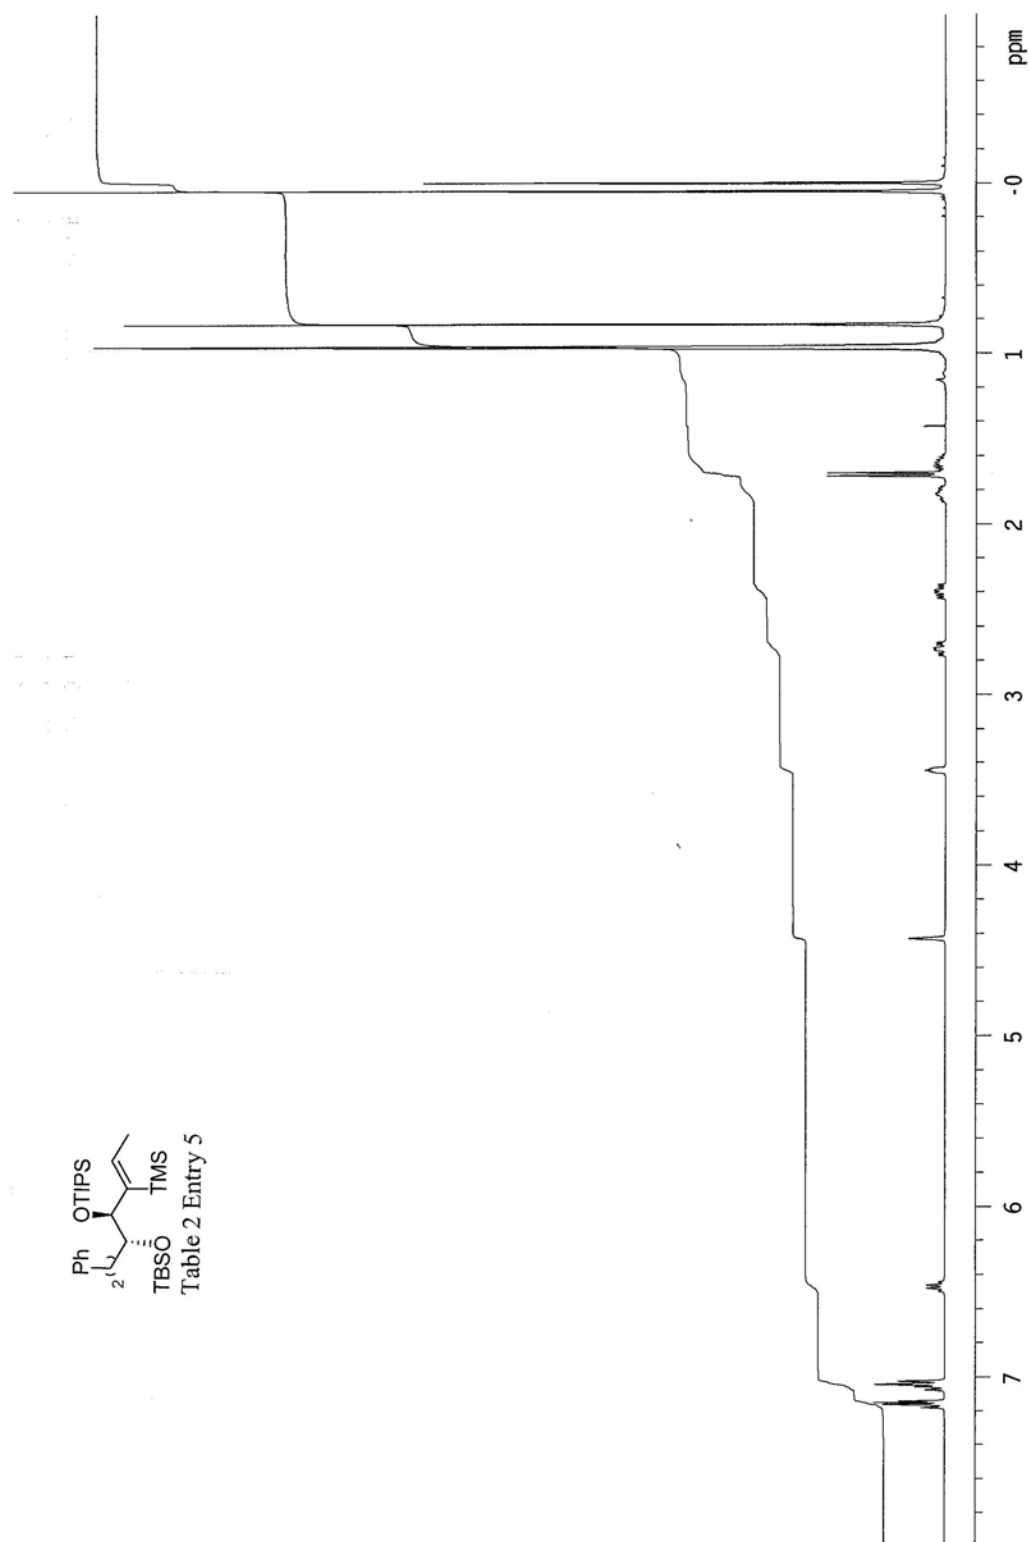

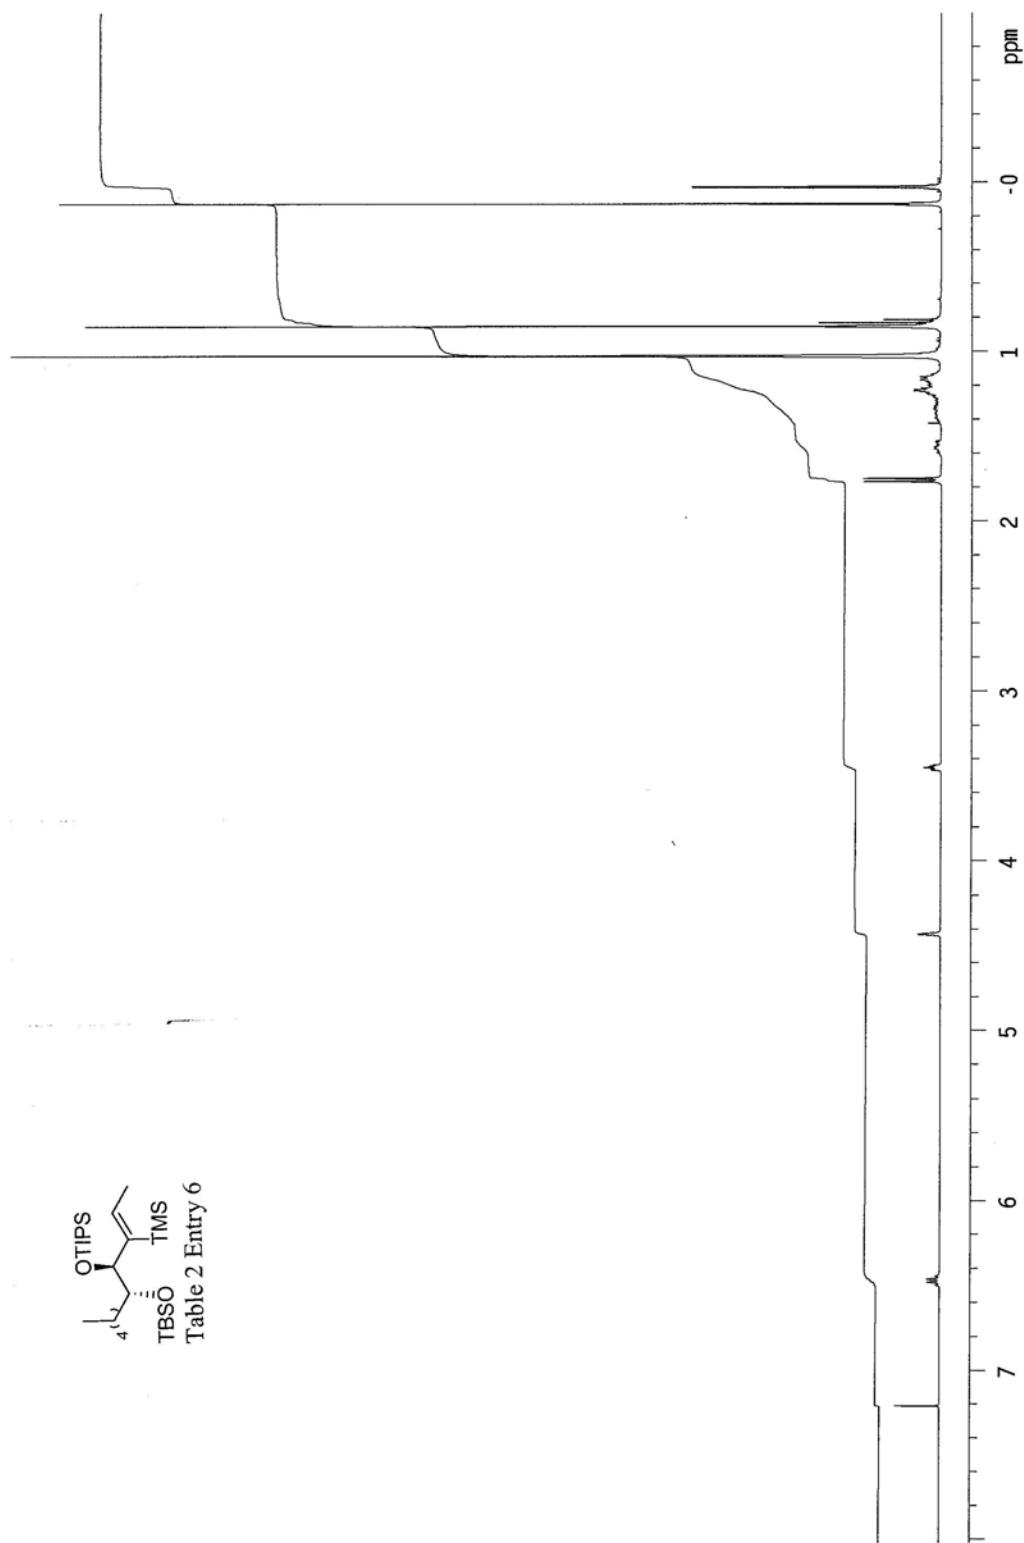

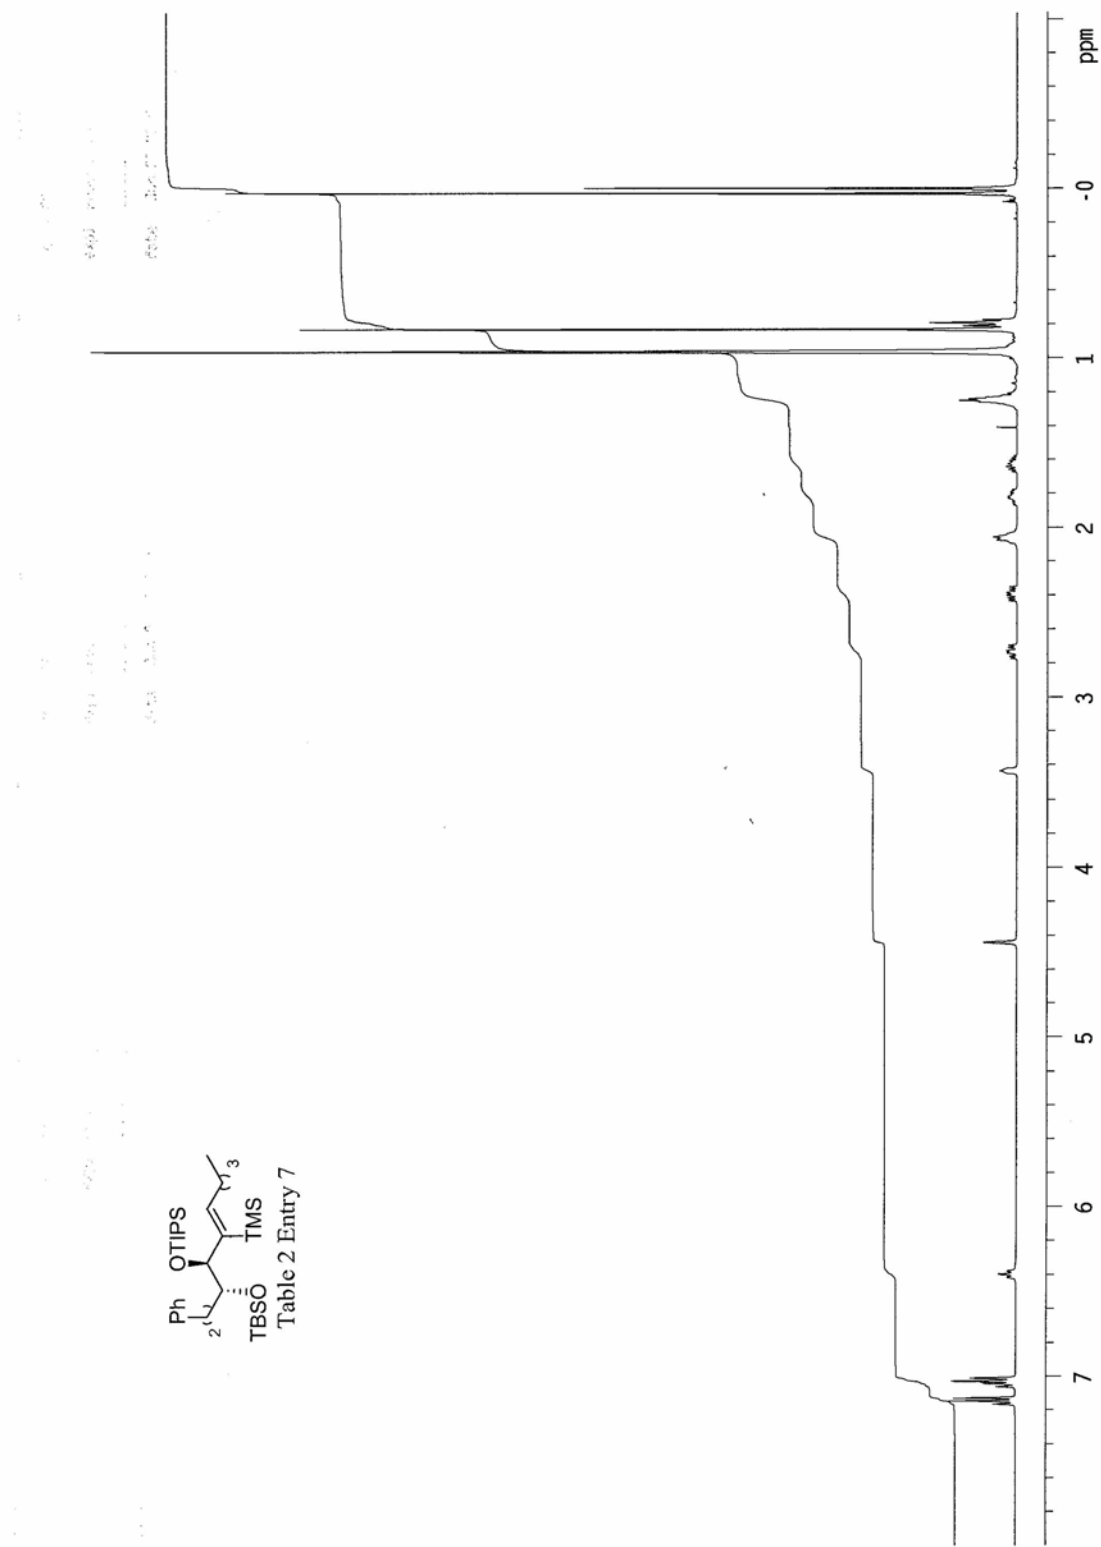

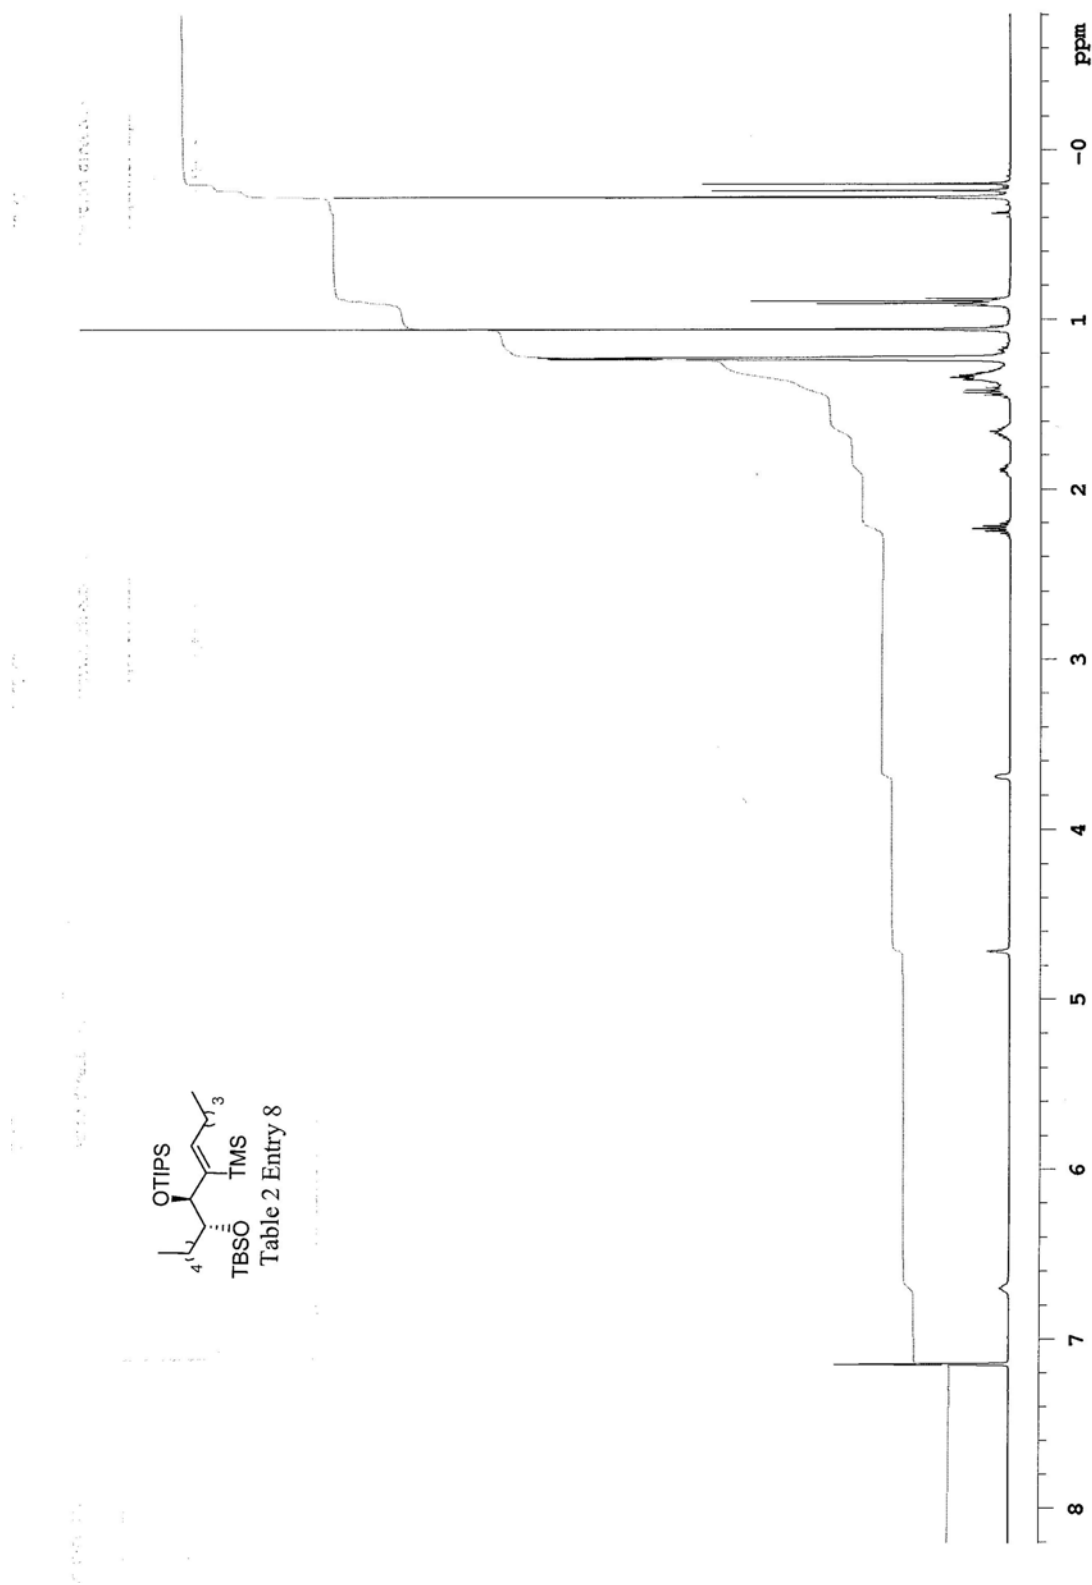

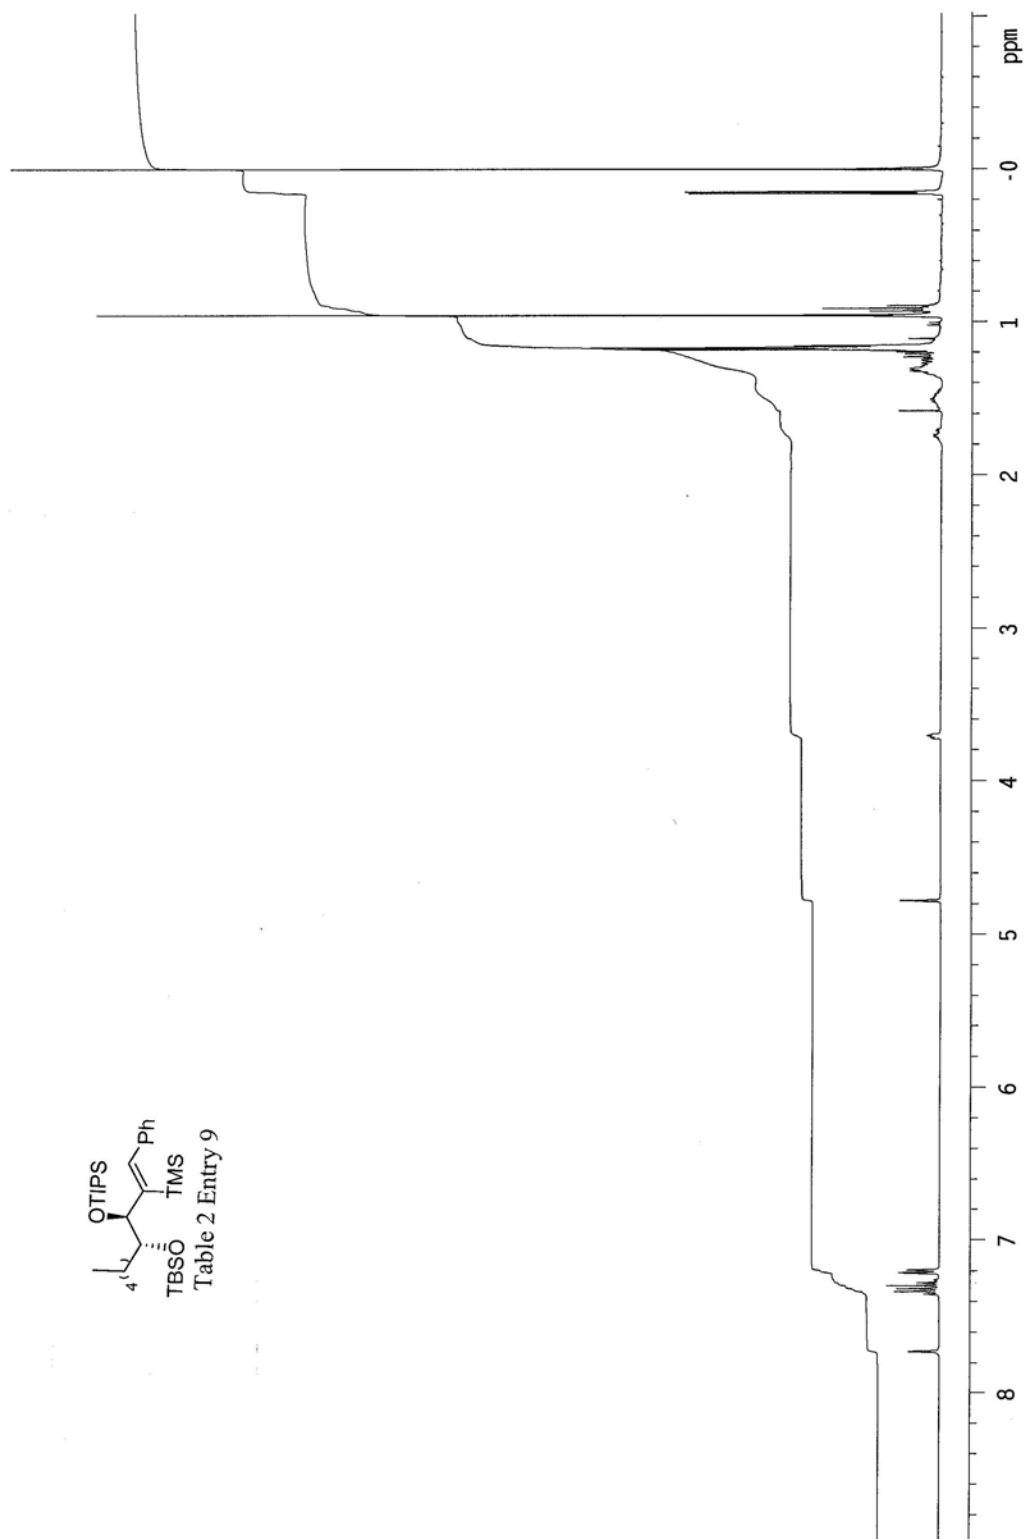

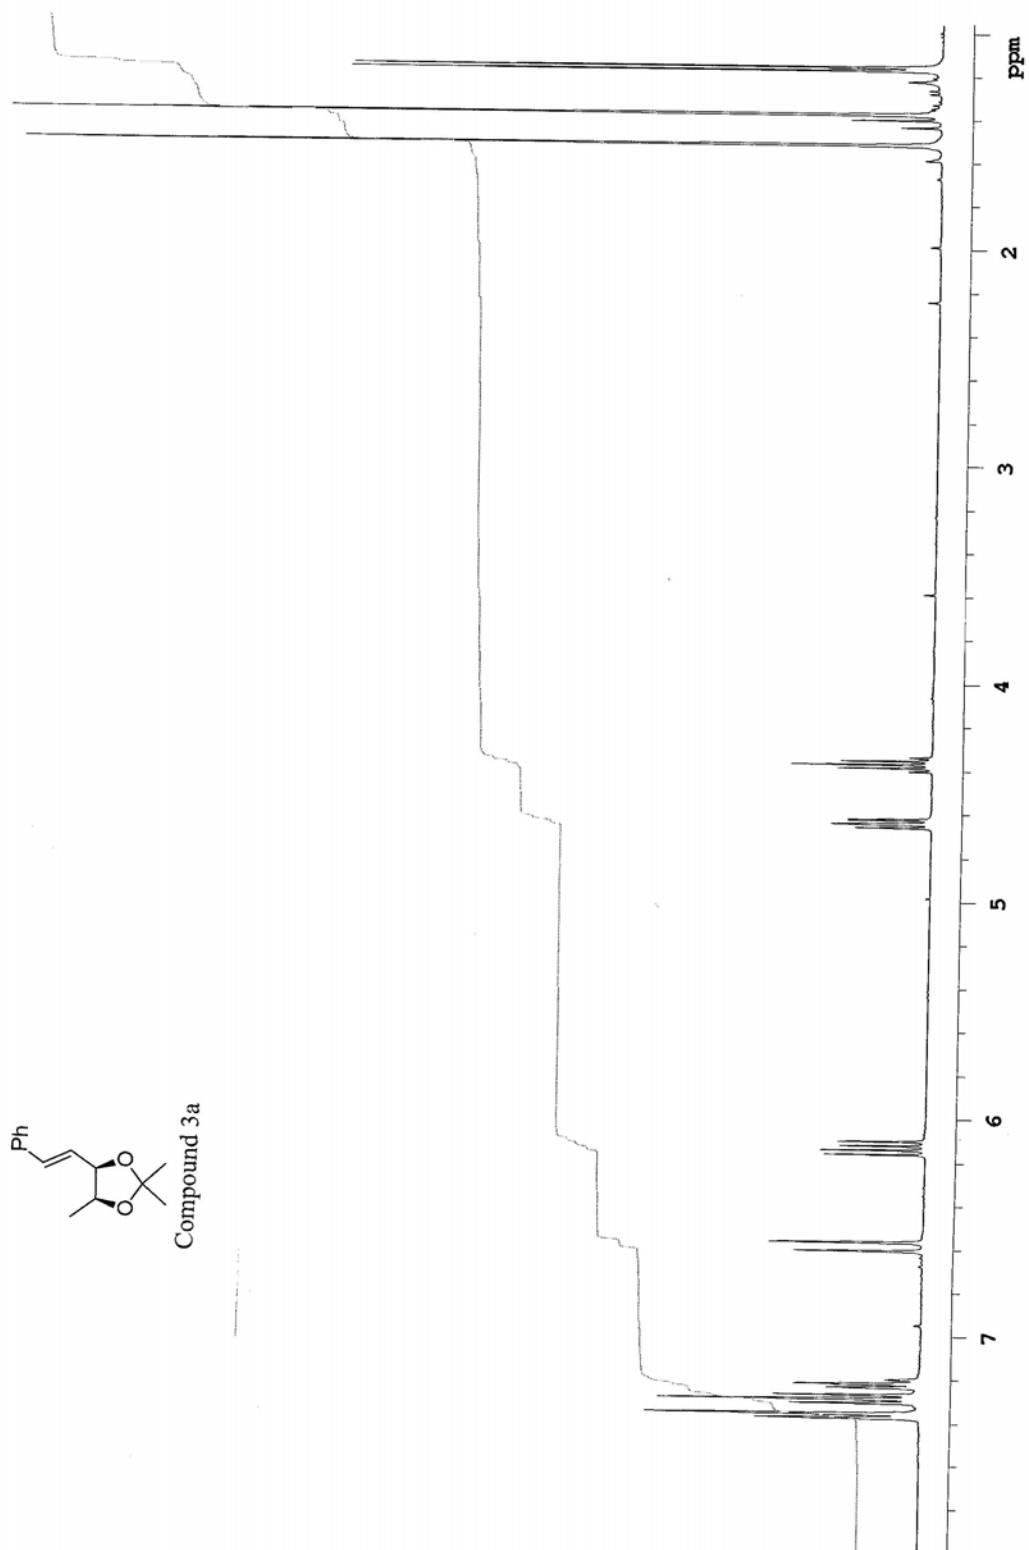



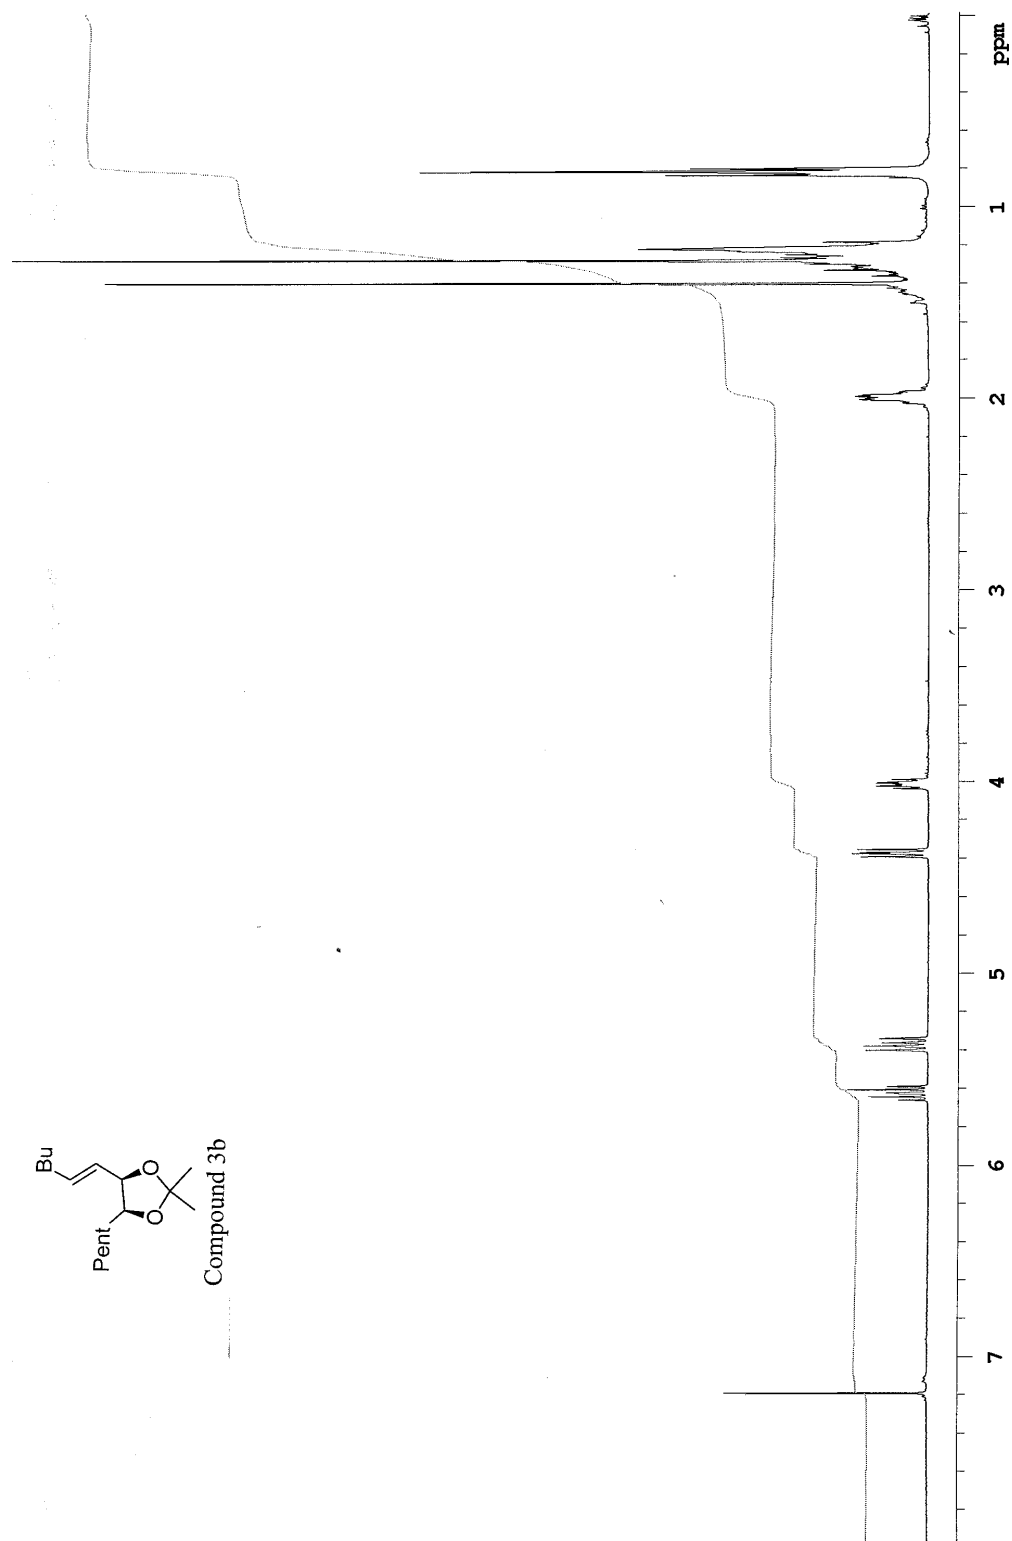

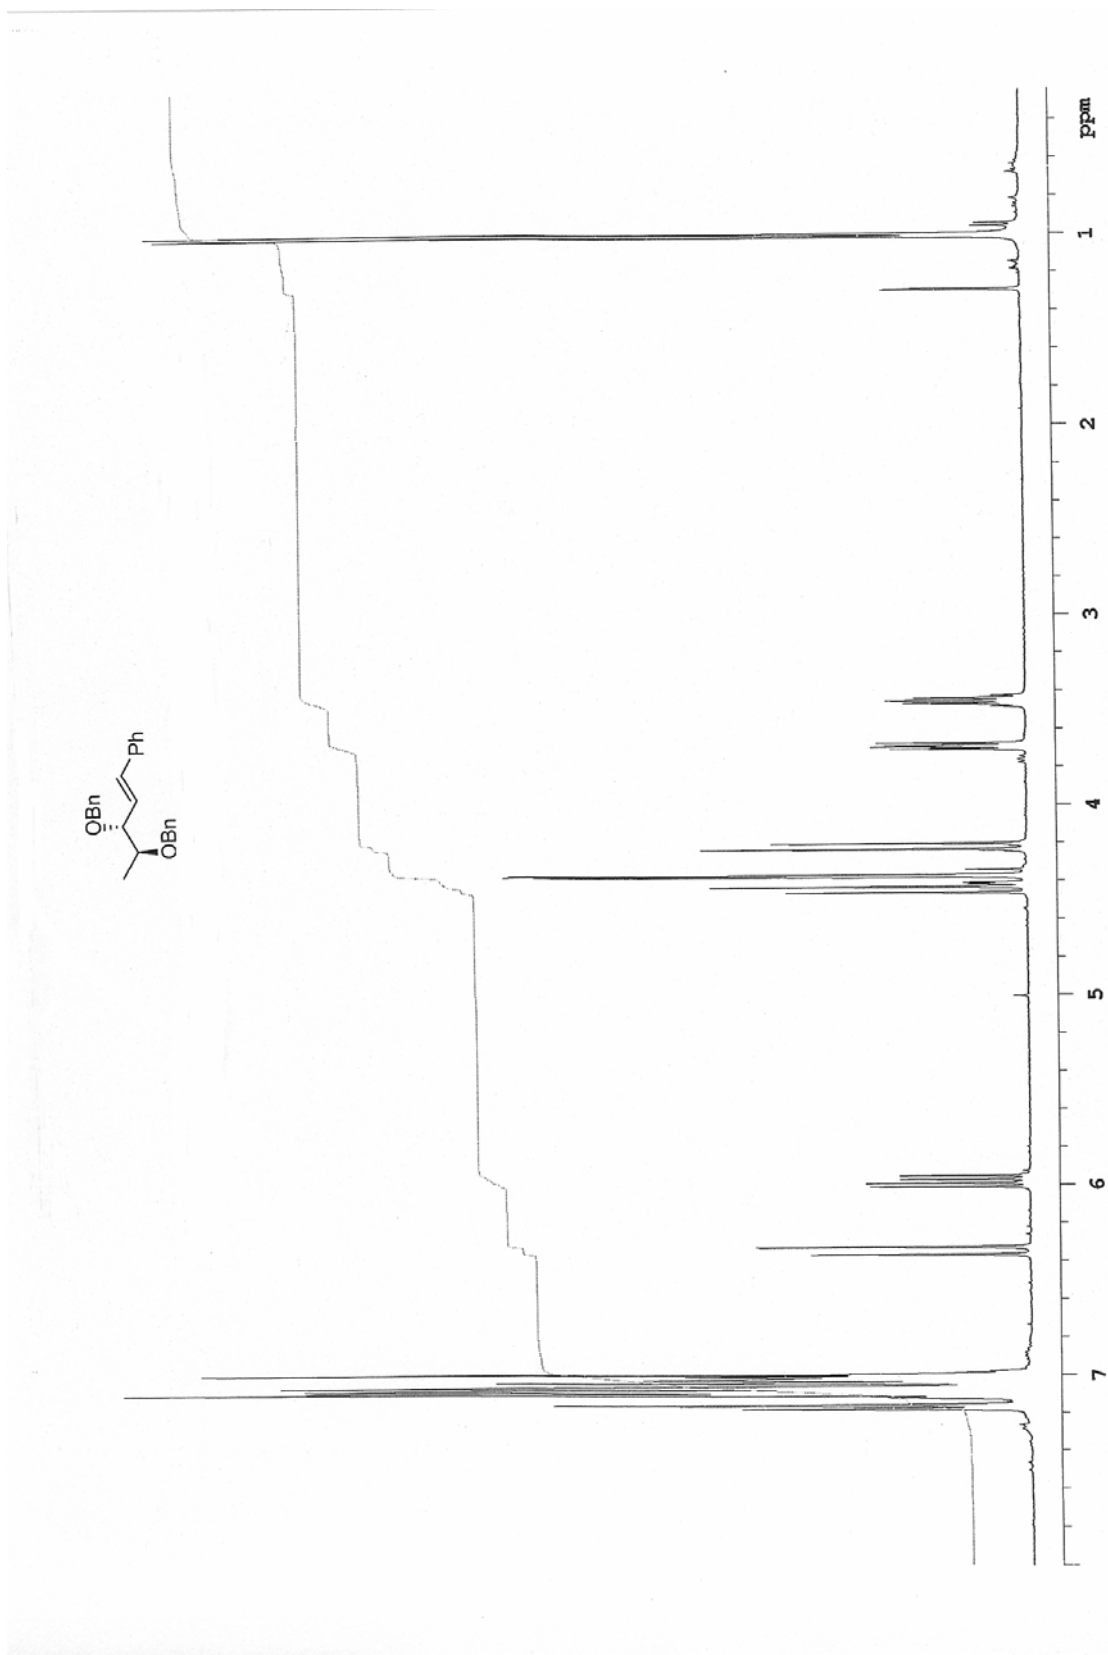

**Compound 5 (Scheme 1)**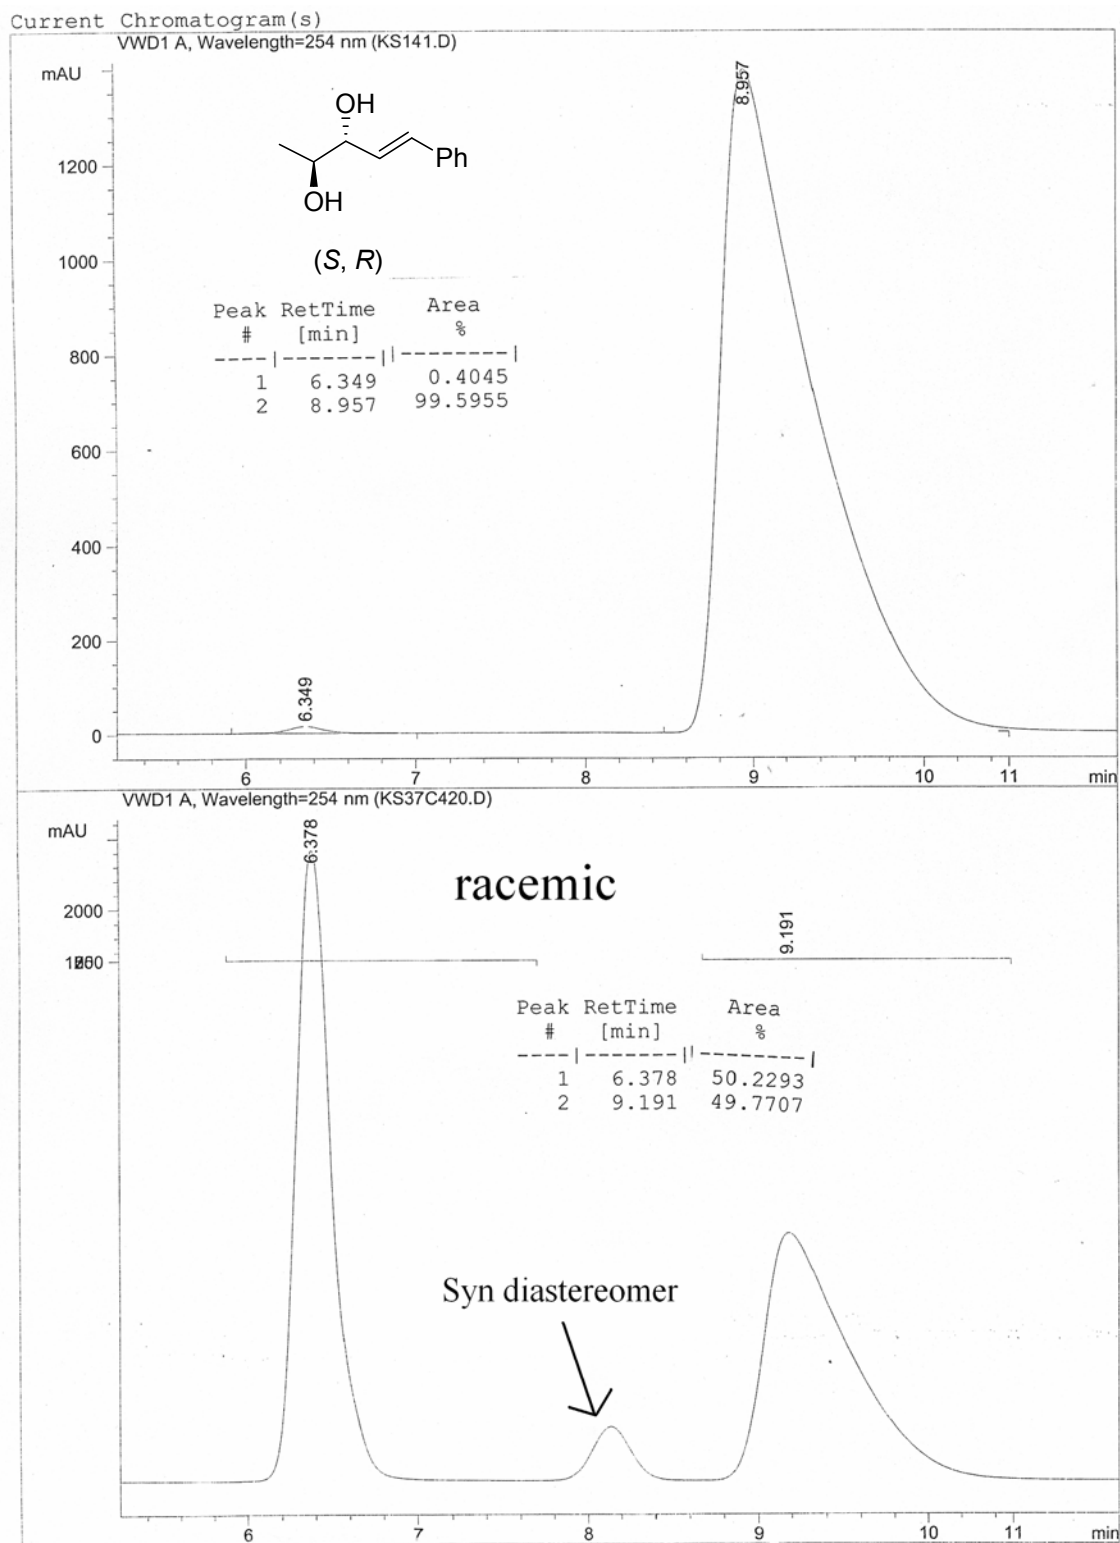

Supplement: NIHMS82853-supplement-1.pdf [file NIHMS82853-supplement-1.pdf]
